1 **A dual sRNA in *Staphylococcus aureus* induces a metabolic switch**  
2 **responding to glucose consumption**

3

4 Bronesky D.<sup>1</sup>, Desgranges E.<sup>1</sup>, Corvaglia A.<sup>2</sup>, François P.<sup>2</sup>, Caballero C.J.<sup>3</sup>, Prado L.<sup>3</sup>,  
5 Toledo-Arana A.<sup>3</sup>, Lasa I.<sup>4</sup>, Moreau K.<sup>5</sup>, Vandenesch F.<sup>5</sup>, Marzi S.<sup>1</sup>, Romby P.<sup>1\*</sup> and  
6 Caldelari I.<sup>1\*</sup>

7

8

9

10 <sup>1</sup>Université de Strasbourg, CNRS, Architecture et Réactivité de l'ARN, UPR9002, F-67000  
11 Strasbourg, France

12 <sup>2</sup>Genomic Research Laboratory, Department of Medical Specialties, Geneva University  
13 Hospitals, University of Geneva, Geneva, Switzerland.

14 <sup>3</sup>Instituto de Agrobiotecnología (IdAB). CSIC-UPNA-GN, 31192-Mutilva, Navarra, Spain.

15 <sup>4</sup>Navarrabiomed-Universidad Pública de Navarra-Departamento de Salud, IDISNA,  
16 Pamplona, Spain.

17 <sup>5</sup>CIRI, International Center for Infectiology Research, Inserm, U1111, Université Claude  
18 Bernard Lyon 1, CNRS, UMR5308, École Normale Supérieure de Lyon, Hospices Civils de  
19 Lyon, Univ Lyon, F-69008, Lyon, France

20

21

22

23

24

25

26

27 \*To whom correspondence should be addressed. Tel: 33(0) 388417068; Fax: 33(0)  
28 388602218; Email: [i.cadelari@ibmc-cnrs.unistra.fr](mailto:i.cadelari@ibmc-cnrs.unistra.fr); [p.romby@ibmc-cnrs.unistra.fr](mailto:p.romby@ibmc-cnrs.unistra.fr)

29

30 **ABSTRACT**

31 Pathogenic bacteria must rapidly adapt to ever-changing environmental signals or nutrient  
32 availability resulting in metabolism remodeling. The carbon catabolite repression represents  
33 a global regulatory system, allowing the bacteria to express genes involved in carbon  
34 utilization and metabolization of the preferred carbon source. In *Staphylococcus aureus*,  
35 regulation of catabolite repressing genes is mediated by the carbon catabolite protein A  
36 (CcpA). Here, we have identified a CcpA-dependent small non-coding RNA, RsaI that is  
37 inhibited by high glucose concentrations. RsaI represses the translation of mRNAs encoding  
38 a major permease of glucose uptake, the FN3K enzyme that protects proteins against  
39 damages caused by high glucose concentrations, and IcaR, the transcriptional repressor of  
40 exopolysaccharide production. Besides, RsaI regulates the activities of other sRNAs  
41 responding to the uptake of glucose-6 phosphate or NO. Finally, RsaI inhibits the expression  
42 of several enzymes involved in carbon catabolism pathway, and activates genes involved in  
43 energy production, fermentation and NO detoxification when the glucose concentration  
44 decreases. This multifunctional RNA provides a signature for a metabolic switch when  
45 glucose is scarce and growth is arrested.

46  
47

## 48 INTRODUCTION

49 All bacteria require a carbon source, providing energy for their growth, division, and for the  
50 synthesis of all macromolecules. Besides, pathogenic bacteria during the infectious process  
51 of the host, must cope with hostile conditions such as nutrient deficiency, temperature,  
52 oxidative and osmotic shocks, and must overcome innate immune responses. For instance,  
53 *Staphylococcus aureus* uses carbohydrates to grow under high NO and anaerobiosis (Vitko  
54 et al., 2016). To survive in these complex environments and to counteract the host defense,  
55 *S. aureus* produces a plethora of virulence factors. The synthesis of these factors is fine-  
56 tuned by intricate interactions between multiple regulators involving both proteins and RNAs  
57 (Novick, 2003). Additionally, biosynthetic intermediates, generated from the central  
58 metabolism of *S. aureus*, have strong impacts on the synthesis of virulence factors. Besides,  
59 several metabolite-sensing regulatory proteins (CcpA, CodY, Rex and RpiR) act as key  
60 regulatory factors to coordinate the synthesis of genes involved in metabolic pathways, in  
61 stress responses, and in pathogenesis (Somerville and Proctor, 2009; Richardson et al.,  
62 2015). Through the adaptation of the metabolism of the bacteria to specific host  
63 microenvironment, these proteins contribute to *S. aureus* pathogenesis (Richardson et al.,  
64 2015).

65 Among these proteins, the carbon catabolite protein A (CcpA) acts as a catabolite  
66 regulator, allowing the bacteria to use the preferred carbon source (i.e., glucose) in a  
67 hierarchical manner (Seidl et al., 2008a; Seidl et al., 2009). CcpA belongs to the LacI  
68 repressor family and binds to a specific DNA sequence, called the *cre* (catabolite responsive  
69 element) sequence, which is conserved in many Gram-positive bacteria. Transcription of  
70 CcpA is constitutive and the protein is activated through the binding of its co-regulator  
71 histidine-containing phosphocarrier protein HPr in the presence of glucose. Inactivation of  
72 *ccpA* gene affects the expression of a large number of metabolic encoding genes in a  
73 glucose-dependent and -independent manner (Seidl et al., 2008a). Additionally, CcpA has a  
74 strong impact on the expression of *S. aureus* virulon. It enhances the yield of the quorum-  
75 sensing induced RNAIII, which represses Protein A and various adhesion factors at the post-  
76 transcriptional level, and conversely activates the synthesis of many exotoxins. However,  
77 CcpA also modulates the transcription of mRNAs encoding Protein A,  $\alpha$ -hemolysin (*hla*) and  
78 TSST (Seidl et al., 2008b ; Seidl et al., 2006), represses capsule formation, and activates  
79 biofilm formation in a glucose-rich environment (Seidl et al., 2008a). Indeed a *S. aureus*  
80 *ccpA* deletion mutant strain was less pathogenic than the wild-type strain in a murine  
81 abscess model (Li et al., 2010) and why *ccpA* inactivation increased the susceptibility of  
82 hyperglycemic animals to acute pneumonia infections (Bischoff et al., 2017). Nevertheless,  
83 the mechanism by which CcpA affected *S. aureus* pathogenesis cannot be simply resumed

84 as a modulation of the RNAIII-dependent regulatory networks. Therefore, it has been  
85 suggested that CcpA can also act indirectly on gene expression through the action of other  
86 regulatory proteins or sRNAs (Somerville and Proctor, 2009; Richardson et al., 2015).

87 In Enterobacteriaceae, several small non-coding RNAs (sRNAs) have been shown  
88 as key actors of the uptake and the metabolism of carbohydrates (reviewed in Bobrovskyy  
89 and Vanderpool, 2014). For instance, they participate in the regulation of the galactose  
90 operon and carbon catabolite repression, metabolism of amino acids, and contribute to  
91 bacterial survival during phospho-sugar stress. The importance of sRNAs in regulatory  
92 networks is now well recognized to rapidly adjust cell growth to various stresses and  
93 changes in the environment. Thus, they are obvious candidates creating the links between  
94 virulence and metabolism. One example is RsaE, a sRNA conserved in *S. aureus* and  
95 *Bacillus subtilis*, that controls enzymes involved in the TCA cycle (Geissmann et al., 2009;  
96 Bohn et al., 2010). Recent observations showed that *B. subtilis* ResD represses RoxS  
97 (homologous to *S. aureus* RsaE) to readjust the pool of NAD<sup>+</sup>/NADH in responses to  
98 various stress and stimuli (Durand et al., 2017). Its promoter is also highly conserved among  
99 *Staphylococceae* and is recognized by the orthologous response regulator SrrA in *S. aureus*.  
100 Responding to reactive oxygen species through SrrAB, *S. aureus* RsaE may also intervene  
101 in the survival of cells against host immune reactions (Durand et al., 2015; Durand et al.,  
102 2017).

103 Here, we have identified a signaling pathway responding to glucose uptake, which  
104 involves a sRNA, called RsaI. This 144 nucleotides-long sRNA is highly conserved among  
105 *Staphylococcaceae*, and carries two conserved regions including two G-track sequences and  
106 a long unpaired interhelical region rich in pyrimidines (Geissmann et al., 2009; Marchais et  
107 al., 2010). RsaI is strongly expressed at the stationary phase of growth in rich medium  
108 (Geissmann et al., 2009), and is enhanced after vancomycin exposure (Howden et al., 2013).  
109 In this study, we revealed that CcpA is the main repressor of RsaI expression in the  
110 presence of glucose, and that this inhibition is alleviated after the utilization of glucose. The  
111 identification of the targetome of RsaI using the MS2-affinity purification approach coupled to  
112 RNA sequencing (MAPS), unexpectedly showed two classes of RNA targets, including  
113 mRNAs involved in glucose uptake, sugar metabolism, and biofilm formation, as well as  
114 various sRNAs. Using site-directed mutagenesis, we identified two functional regions of RsaI  
115 with distinct regulatory functions.

116 Taken together, these data illustrate how a multifunctional RNA provides a signal for  
117 a metabolic switch when the preferred carbon source is metabolized, and may serve as an  
118 RNA sponge to control the balance between two essential pathways responding to either  
119 glucose or glucose 6-phosphate uptake. We will discuss the importance of sRNA-mediated

120 regulation in *S. aureus* to fine tune the expression of genes according to essential nutrient  
121 availability, and their consequences on metabolism adaptation and virulence.

122

## 123 RESULTS

124

### 125 **The expression of RsaI is inhibited by glucose and by the carbon catabolite protein A.**

126 We have previously shown that the synthesis of RsaI is high at the stationary phase of  
127 growth in the BHI medium while its expression was considerably enhanced at the  
128 exponential phase of growth in MHB medium (Geissmann et al., 2009). These data  
129 suggested that RsaI expression is regulated in a manner dependent on nutrient or  
130 biosynthetic intermediate availability. An obvious difference between BHI and MHB  
131 composition is their carbon source, glucose and starch, respectively. We wondered if the  
132 expression of RsaI might be dependent on the available carbon source. For this purpose,  
133 Northern blot experiments were performed on total RNAs prepared from HG001 (wild type)  
134 strain grown in the MHB medium at various time points (Figure 1A, 1B). In MHB where the  
135 glucose is not immediately available as the carbon source, RsaI was constitutively and  
136 highly expressed (Figure 1A). Conversely, when glucose was added, either at the beginning  
137 of the culture or after 3 h of growth, transcription of RsaI was immediately stopped,  
138 indicating the repressing effect of this sugar (Figure 1A).

139 As CcpA sensed the intracellular concentration of glucose (Seidl et al. 2006), we  
140 analyzed if the expression of RsaI was CcpA-dependent. Northern blot analysis was  
141 performed on total RNA extracts prepared from HG001 strain and an isogenic mutant  
142 deleted of *ccpA* gene ( $\Delta ccpA$ ). The same experiment was performed with a mutant strain  
143 lacking the *codY* gene, which was shown as a direct regulator of amino acid biosynthesis,  
144 transport of macromolecules, and virulence (Majerczyk et al., 2010; Pohl et al., 2009). In the  
145 absence of glucose, the yield of RsaI was similar in all strains. However, in the MHB medium  
146 supplemented with glucose, the expression of RsaI dropped dramatically in the WT and  
147  $\Delta codY$  strains, whereas the expression of RsaI was still high in  $\Delta ccpA$  strain (Figure 1C). In  
148 BHI medium, RsaI was expressed after 4 h of growth, while its expression was constitutive  
149 in the mutant  $\Delta ccpA$  strain (Figures 1D, S1A).

150 We also analyzed the expression of RsaI in MHB medium supplemented with various  
151 sugars such as fructose and xylose (Figure 1E). The data showed that the expression of  
152 RsaI is very low at the beginning of growth in MHB supplemented with either glucose or  
153 fructose while the expression of RsaI is constitutive in MHB supplemented with xylose.  
154 These data suggest that the inhibition of RsaI transcription is only dependent of hexoses  
155 (Figure 1E).

156 Overall, we showed that CcpA represses RsaI expression in the presence of glucose.  
157 In accordance with this data, a conserved *cre* (GGAAAcGcTTACAT) sequence was found at  
158 position -30 upstream the transcriptional start site of RsaI (Figure S1B). This region was  
159 sufficient to confer repression by glucose in the complemented strain containing  
160 pCN51::*PrsaI* (data not shown).

161

### 162 **The targetome of RsaI as revealed by the MAPS approach.**

163 The MAPS approach (“MS2 affinity purification coupled to RNA sequencing”) was used to  
164 purify *in vivo* regulatory complexes involving RsaI. MAPS has been successful to identify the  
165 RNA targets of any sRNAs in *E. coli* (Lalaouna et al., 2015), and more recently of RsaA  
166 sRNA in *S. aureus* (Tomasini et al., 2017). Briefly, the MS2 tagged version of RsaI was  
167 expressed from a plasmid under the control of the *agr*-dependent P3 promoter, allowing an  
168 accumulation of the RNA at the stationary phase of growth in the  $\Delta$ *rsaI* mutant strain. RsaI  
169 was detected by Northern blot using total RNAs extracted at 2, 4 and 6 h of growth in BHI  
170 medium. Using a DIG-labeled RsaI probe, we showed that the steady state levels of MS2-  
171 RsaI were very similar to the wild type (WT) RsaI, and that MS2-RsaI was specifically  
172 retained by the MS2-MBP fusion protein after the affinity chromatography (Figure S1C). The  
173 RNAs were then extracted from the eluted fraction to be sequenced. The data were  
174 analyzed using Galaxy (Afgan et al., 2016) and the sequencing reads were mapped with the  
175 reference HG001 genome (Caldelari et al., 2017; Herbert et al., 2010) counted per feature  
176 and normalized. The enrichment of putative targets was done by comparing the number of  
177 reads obtained from the MS2-RsaI purification and the MS2 alone as control. The data were  
178 reproduced in two independent experiments (Tables 1, S3).

179 Interestingly, two classes of RNAs were co-purified with RsaI, including several  
180 mRNAs and sRNAs. The best mRNA candidate encodes IcaR, the repressor of the  
181 *icaADBC* operon, which is required for the synthesis of the poly-b-1,6-N-acetylglucosamine  
182 polymer (PIA-PNAG), the main staphylococcal exopolysaccharide in biofilm. Several mRNAs  
183 encode proteins linked to sugar utilization and transport, such as *glcU\_2* encoding a major  
184 transporter of glucose, and *fn3K* encoding fructosamine 3-kinase, and other less enriched  
185 mRNAs (< 4-fold) produce the trehalose-specific PTS transporter (TreB), a sugar  
186 phosphatase (YidA), and a maltose transport system permease (Table S3). Finally, several  
187 mRNAs express transcriptional regulators (Xre type, the maltose regulatory protein GlvR,  
188 SlyA, SigS). As for sRNAs, we found RsaD, RsaE, RsaG, and the less enriched RsaH,  
189 which all contained at least one conserved C-rich motif (Geissmann et al., 2009).

190 We then searched for possible intermolecular base-pairing interactions between RsaI  
191 and its potential RNA targets using IntaRNA (Table 1). Stable interactions were predicted for  
192 most of the enriched RNAs. The CU-rich unpaired region of RsaI was predicted to form

193 base-pairings with most of the mRNAs. They were located close or at the ribosome binding  
194 sites of most of the mRNAs except for *icaR* and *isaA*, which involves nucleotides in their 3'  
195 untranslated region (Table 1). A second domain of interaction corresponded to the G-track  
196 sequences located in the first hairpin domain of RsaI and the C-rich sequences of the  
197 sRNAs RsaD, RsaE, RsaG and RsaH.

198 These data suggested that RsaI is a multifunctional RNA, which regulates the  
199 expression of mRNAs at the post-transcriptional level, while its activities might be regulated  
200 by other sRNAs.

201

### 202 **RsaI contains two distinct regulatory domains.**

203 Based on the MAPS data, we first analyzed whether RsaI effectively binds to the mRNA and  
204 sRNA candidates using gel retardation assays (Figures 2 B, C and S2). *In vitro* 5' end-  
205 labeled RsaI was incubated with increasing concentrations of various mRNAs, for example,  
206 those encoding proteins involved in biofilm formation (*IcaR*), sugar uptake and metabolism  
207 (*GlvR*, *GlcU\_2*, *IsaA*, and *Fn3K*), and several sRNAs (*RsaG*, *RsaE*, and *RsaD*). For these  
208 experiments, we used the full-length mRNAs and sRNAs (Table S2). Complex formation  
209 was performed with RNAs, which were renatured separately in a buffer containing  
210 magnesium and salt. As expected, the data showed that RsaI formed complexes with high  
211 affinity (between 20-100 nM, Table 1) with many RNAs such as *icaR*, *glcU\_2*, and *fn3K*  
212 mRNAs, and *RsaG* sRNA (Figure 2). The stability of other complexes (e.g. *treB* mRNA and  
213 *RsaD* sRNA) was significantly lowered (> 250 nM) (Figure S2).

214 Based on the base-pairing predictions, mutations have been introduced into *rsaI* to  
215 map its functional regulatory regions. The two G-track sequences were mutated separately  
216 (*RsaI* mut1:  $\Delta$ G7-G10, *RsaI* mut2:  $\Delta$ G26-G29) or together (*RsaI* mut3:  $\Delta$ G7-G10/ $\Delta$ G26-G29),  
217 while several nucleotides (*RsaI* mut4:  $\Delta$ U81-U107) were deleted in the interhelical unpaired  
218 sequence (Figure 2A). We then analyzed the ability of mutated *RsaI* derivatives to form  
219 complexes with *glcU\_2*, *fn3K*, and *icaR* mRNAs, and *RsaG* sRNA (Figure 2B). The data  
220 showed that *RsaI* mut3 bind to all three mRNAs similarly to the WT *RsaI*, while complex  
221 formation was completely abolished with *RsaI* mut4. Only the mutations in the second G-  
222 track sequences (*RsaI* mut 2) strongly altered the binding to *RsaG*, while the two other  
223 mutated *RsaI* (mut1 and mut4) recognized *RsaG* with an equivalent binding affinity as the  
224 WT *RsaI* (Figure 2C).

225 The MAPS approach was also used to monitor the effect of the mutations in *RsaI* on  
226 its target RNAs *in vivo*. The MS2 tagged mutant versions of *RsaI* (mut2 and mut4) were  
227 expressed in the HG001 $\Delta$ *rsaI* mutant strain. As described above, the enrichment of putative  
228 targets was calculated by comparing the number of reads obtained from MS2-*RsaI*  
229 purification and the MS2 alone as control (Table S4). In the fraction containing MS2-*RsaI*

230 mut4, the mRNA targets encoding IcaR, Fn3K, and GlcU\_2 were strongly reduced while  
231 RsaG was still significantly enriched. Conversely, we observed that the three mRNAs were  
232 still co-purified together with the MS2-RsaI mut2 at a significant level close to the WT RsaI  
233 while RsaG was strongly reduced in the fraction containing MS2-RsaI mut2.

234 The MAPS experiments are well correlated with the gel retardation assays. Hence,  
235 they revealed that RsaI has at least two distinct regulatory domains that directly interact  
236 either with mRNAs or with sRNAs.

237

### 238 **The effect of RsaI on global gene transcription in *S. aureus*.**

239 In order to get a global overview of RsaI impact on gene regulation, a comparative  
240 transcriptomic analysis was performed on total RNAs extracted from the WT HG001 strain,  
241 the isogenic HG001 $\Delta$ rsaI mutant strain, and the same mutant strain complemented with a  
242 plasmid expressing RsaI under the control of its own promoter (Table S5). The cultures were  
243 done in triplicates with high reproducibility in BHI medium at 37°C until 6h, under the  
244 conditions allowing the expression of RsaI (Figure 1). We have considered a gene to be  
245 regulated by RsaI if the ratio between two strains is at least twofold. Significant differences  
246 were mostly observed between the mutant  $\Delta$ rsaI versus the same strain expressing RsaI  
247 from a plasmid. Accordingly, the mRNA levels of 26 and 50 CDS were significantly  
248 decreased and enhanced, respectively, when the complemented strain was compared to the  
249 mutant  $\Delta$ rsaI (Table S5). Most of the RsaI-dependent activation was observed for genes  
250 involved in fermentation processes (i.e., *ldh1* encoding lactate dehydrogenase, *adh*,  
251 encoding alcohol dehydrogenase, *pflB* encoding formate acetyltransferase, *focA* encoding  
252 one of the formate transporter, and *pflA* encoding pyruvate-formate lyase activating enzyme),  
253 in energy-generating processing (i.e., *qoxABCD* operon encoding terminal oxidases for  
254 aerobic respiration, *ctaA* encoding heme synthase, *hmp* encoding flavoprotein), in amino  
255 acid metabolism (i.e., *arg* encoding arginase, *proP* encoding proline/betaine transporter,  
256 *tdcB* encoding L-threonine dehydratase catabolic), in peptide transport system (*oppB/D*),  
257 and in the biosynthesis of co-factors and prosynthetic groups (i.e., *nasE-nasF* operon). The  
258 levels of two sRNAs (RsaG, RsaH) were also enhanced in the HG001 WT strain. Besides,  
259 the overexpression of RsaI caused a reduced expression of genes that are functionally  
260 related. Several of them are involved in glycolysis and pentose phosphate pathway (i.e.,  
261 *fba1* encoding fructose bi-phosphate aldolase, *gnd* encoding 6-phosphogluconate  
262 dehydrogenase, *tkt* encoding transketolase, *treR\_2* encoding transcriptional repressor of the  
263 trehalose operon containing *treB*), in thiamine co-factor synthesis (*thiDME* operon, *tenA*  
264 encoding a putative thiaminase, *thiW* encoding a thiamine transporter), in carbohydrate  
265 uptake (*ptsI* encoding phosphoenolpyruvate-protein phosphotransferase), and in arginine  
266 catabolism (*arc* operon). Additionally, significant repression was also observed for *miaB*



267 encoding tRNA specific modification enzyme, *tyrS* encoding tryptophanyl-tRNA synthetase,  
268 and *ebpS* encoding the cell surface elastin binding protein. Interestingly, the MAPS  
269 approach revealed that several of these mRNAs (i.e., *qoxABCD* operon, *tyrS*, *arcC1*, *treR\_2*,  
270 *plfA-plfB*) were enriched together with RsaI (Table S3). In contrast, most of RsaI targets  
271 identified by MAPS did not show significant mRNA level variations when RsaI was deleted or  
272 overexpressed suggesting RsaI regulates the translation of these mRNAs.

273 These data showed that high concentrations of RsaI affected the mRNA levels of  
274 several enzymes involved in sugar metabolism, in the pentose phosphate pathway, and  
275 various processes linked to energy production.

276

### 277 **RsaI inhibits the translation of several mRNAs by masking their RBS.**

278 We then analyzed whether RsaI would preferentially regulate translation of *glcU\_2* and *fn3K*  
279 mRNA targets because their levels were not altered in the  $\Delta$ *rsaI* mutant strain and the C/U  
280 unpaired region of RsaI was predicted to base-pair with their SD (Figure 2). Using toe-  
281 printing assays, we analyzed the effect of RsaI on the formation of the ternary initiation  
282 complex constituting of mRNA, the initiator tRNA, and the 30S subunit. For both mRNAs, the  
283 formation of the ternary initiation complex is illustrated by the presence of a toe-print signal  
284 at position +16 (+1 being the initiation codon). For *fn3K* mRNA, two toe-print signals were  
285 observed at +16 and at +20, most probably corresponding to the presence of two AUG  
286 codons distant of 5 nucleotides. However, only the first AUG is used *in vivo* (Gemayel et al.,  
287 2007). The addition of increasing concentrations of RsaI together with the 30S strongly  
288 decreased the toe-print signals for both mRNAs showing that RsaI is able to form a stable  
289 complex with the mRNA sufficient to prevent the binding of the 30S subunits (Figure 3A).

290 To further validate the *in vivo* relevance of RsaI-dependent repression of the mRNA  
291 *glcU\_2*, *fn3K*, *treB*, *HG001\_01242*, we analyzed the expression of a reporter construct  
292 carrying their regulatory regions fused to *lacZ* and expressing RsaI under its own promoter  
293 in *S. aureus* HG001 $\Delta$ *rsaI* strains. The  $\beta$ -galactosidase activity was reproducibly found higher  
294 in the  $\Delta$ *rsaI* mutant strain for all reporter constructs (Figure 3B) showing that the absence of  
295 RsaI alleviated the repression of the reporter gene.

296 These data strongly suggested that RsaI primarily regulated translation initiation of  
297 *glcU\_2*, *fn3K*, *treB*, *HG001\_01242* and *HG001\_02520* mRNAs mainly by masking their  
298 ribosome binding sites.

299

### 300 **RsaI interacts with *icaR* mRNA and affects PIA-PNAG synthesis.**

301 We have shown that RsaI is able to form stable base-pairings with *icaR* mRNA that encodes  
302 the repressor of the main exopolysaccharidic compound of *S. aureus* biofilm matrix. This  
303 mRNA is of particular interest because it contains a large 3' UTR that is able to bind to its

304 own Shine and Dalgarno (SD) sequence (Ruiz de los Mozos et al., 2013). Consequently, the  
305 long-range interaction provokes an inhibitory effect on translation and generates a new  
306 cleavage site for RNase III (Ruiz de los Mozos et al., 2013). RsaI is predicted to form base-  
307 pairings with the 3'UTR of *icaR* downstream of the anti-SD sequence (Table 1). In a first  
308 experiment, we monitored whether the long-range interaction might be critical for RsaI  
309 binding. Previous work showed that the substitution of UCCCCUG sequence by AGGGGAC,  
310 located in the 3'UTR of *icaR*, significantly destabilized the long-range interaction to enhance  
311 *icaR* translation (Ruiz de los Mozos et al., 2013). However, gel retardation assays showed  
312 that the WT and the mutant *icaR* mRNAs bind to RsaI with an equivalent binding affinity  
313 (Figure 2B), suggesting that the anti-SD region is not required for RsaI binding. Instead, we  
314 have shown that the 3'UTR of *icaR* contained the high affinity binding site for RsaI (Figure  
315 4A, Table 1).

316 We then analyzed the capacity of the WT and mutant  $\Delta$ *rsaI* strains to synthesize PIA-  
317 PNAG exopolysaccharides. Dot-blot assays were performed with anti PIA-PNAG specific  
318 antibodies to monitor the levels of PIA-PNAG in the strain 132, which produced high levels  
319 of this exopolysaccharide in the presence of NaCl. We tested the PIA-PNAG levels in WT  
320 strain, the isogenic  $\Delta$ *rsaI* mutant strain and the  $\Delta$ 3'UTR *icaR* mutant strain carrying a  
321 deletion of the 3'UTR of *icaR* grown for 6 h in TSB containing NaCl (Figure 4B). The data  
322 suggested that RsaI and the 3'UTR of *icaR* are required for efficient production of PIA-PNAG  
323 because only the WT strain produces significant levels of exopolysaccharides. The three  
324 strains were also transformed with a plasmid overexpressing RsaI or RsaI mut5 carrying a  
325 substitution of nucleotides 88 to 103 (TTATTACTTACTTTCC to AATAATGAATGAAAGG).  
326 This mutation is expected to decrease the stability of RsaI-*icaR* duplex. Northern blots were  
327 performed to control that RsaI was properly over-expressed in these strains (Figure 4B). In  
328 the WT background, which expresses the endogenous RsaI, the additional overexpression  
329 of WT or the mutated version of RsaI causes a similar enhanced synthesis of PIA-PNAG.  
330 However, in the mutant  $\Delta$ *rsaI* strain background, the expression of RsaI mut5 induces the  
331 accumulation of lower levels of PIA-PNAG than the strain expressing the WT RsaI (Figure  
332 4B). Finally, the synthesis of PIA-PNAG is completely inhibited in the three  $\Delta$ 3'UTR mutant  
333 strains indicating that in this background, RsaI is not able to exert its regulatory functions.

334 Taken together, these data suggest that RsaI would control PIA-PNAG synthesis by  
335 reducing the IcaR repressor protein levels through a specific interaction with the 3'UTR of  
336 *icaR* mRNA.

### 337 **RsaI connects sugar metabolism and NO stress responses through sRNA binding**

338 Three sRNAs (RsaD, RsaE, and RsaG) were significantly enriched together with RsaI. RsaG  
339 is the most enriched sRNA, and the complex formed between RsaI and RsaG was highly  
340 stable (Figure 2). We first addressed the consequences of such pairings on sRNA regulation.

341 Using gel retardation assays, we analyzed whether RsaG is able to form a ternary complex  
342 with RsaI and one of its target mRNA, or if RsaG competes with the mRNA for RsaI binding.  
343 In this experiment, we used a defined concentration of RsaG (50 nM) known to be sufficient  
344 to bind most of RsaI molecules, which were 5' end labeled. In the absence of RsaG, a  
345 concentration dependence of the mRNA *g/cU\_2* shows that it binds efficiently to RsaI. The  
346 addition of RsaG induces the formation of a high molecular weight complex formed by RsaG,  
347 RsaI and the mRNA (Figure 5A). The same results were obtained with other mRNA targets  
348 of RsaI (*HG001\_1242*, *HG001\_0942*) (Figure 5A). The formation of a ternary complex is a  
349 good indication that RsaG binding does not interfere with the regulatory functions of RsaI. In  
350 addition, using rifampicin treatment, we have controlled that the half-lives of RsaI or RsaG  
351 were not significantly modified in the absence of RsaG or RsaI, respectively (Figure 5B).  
352 Thus *in vivo*, the absence of one sRNA did not impact transcription or stability of the other.

353 We have previously shown that RsaG is expressed at the stationary phase of growth  
354 in BHI medium (Geissmann et al, 2009). Interestingly, *rsaG* gene is localized just  
355 downstream the mRNA encoding the hexose phosphate transporter UhpT, whose  
356 transcription is activated by the two component system HptRS in response to extracellular  
357 glucose-6 phosphate (G-6P), another important carbon source produced by host cells  
358 (Figure S3A, Park et al, 2015). We therefore analyzed whether RsaG expression would also  
359 respond to the cellular concentration of G-6P. Northern blot experiments were performed on  
360 total RNA extracts produced from the WT HG001 strain grown in BHI medium supplemented  
361 with G-6P. Under these conditions, the synthesis of RsaG appears to be strongly enhanced  
362 (Figure S3B, left panel). The deletion of *hptRS* considerably reduced the levels of RsaG.  
363 Therefore, these data strongly indicate that RsaG is activated by HptRS upon G-6P  
364 signaling together with *uhpT* (Figure S3B, right panel) and suggest that RsaG sRNA might  
365 be derived from the *uhpT* 3'UTR.

366 We also analyzed the signaling pathway of RsaD. This sRNA was previously shown  
367 to accumulate at the stationary phase of growth and its expression was enhanced under  
368 heat shock conditions (Geissmann et al., 2009). We then demonstrated that the expression  
369 of RsaD is not dependent on the two-component system SaeRS but is strongly enhanced by  
370 SrrAB. Indeed, its expression drops considerably in a  $\Delta$ *srrAB* mutant strain (Figure S3C).  
371 Because SrrAB is able to sense and respond to nitric oxide (NO) and hypoxia (Kinkel et al.,  
372 2013), we tested the effect of NO on RsaD synthesis by adding diethylamine-NONOate, as  
373 previously described (Durand et al., 2015). We observed a significant and reproducible  
374 increase in RsaD expression in the WT strain about 10 min after the addition of  
375 diethylamine-NONOate to the medium (Figure S3D). RsaD expression decreased after  
376 20 min due to the short half-life of diethylamine-NONOate. Upstream *rsaD*, we identified a  
377 conserved motif AGTGACAA that could be responsible for the SrrAB-dependent

378 transcription. It is of interest that the synthesis of RsaE was also shown to be under the  
379 control of SrrAB (Durand et al., 2015).

380 These data suggested that through the binding of sRNAs, RsaI would link sugar  
381 metabolism pathways, carbon source utilization, energy production, and stress responses.

382

## 383 **DISCUSSION**

384 In this work, we have investigated the cellular functions of one abundant sRNA, called RsaI  
385 (or RsaOG), which is highly conserved among *Staphylococcaeae* (Geissmann et al., 2009;  
386 Marchais et al., 2010). In contrast to many sRNAs that contained C-track motifs, this RNA  
387 has the particularity to carry two conserved G-rich sequences and a large unpaired CU-rich  
388 region (Figure 1). This RNA was proposed to fold into a pseudoknot structure involving the  
389 two conserved regions limiting the access of regulatory regions (Marchais et al., 2010).  
390 Combining several global approaches (MAPS, transcriptomic analysis), we show that RsaI  
391 controls a large regulon involved in sugar uptake and metabolism, biosynthetic and co-factor  
392 synthesis, cytochrome biosynthesis, anaerobic metabolism, as well as iron-sulfur cluster  
393 repair, and NO detoxification (Figure 6). Additionally, RsaI emerges in *S. aureus* as a new  
394 class of regulatory RNAs acting as a sponge of several sRNAs carrying C-track sequences  
395 that are induced upon enhanced concentrations of specific metabolite (G-6P) or ROS  
396 signaling pathway (synthesis of NO). Hence, RsaI appears as a key regulator that links  
397 many adaptive pathways in response to the preferred carbon source availability.

398

### 399 **The expression of RsaI is a signature of a metabolic switch responding to glucose.**

400 The cellular level of RsaI is tightly controlled during growth in rich medium. In this study, we  
401 showed that RsaI expression is strongly and rapidly repressed at the transcriptional level  
402 through the activity of CcpA in response to glucose availability. Carbon catabolite repression  
403 is a universal regulatory phenomenon that allows the cells to use the preferred carbon  
404 source to produce energy, and to provide the building blocks for macromolecules.  
405 Concomitantly it represses genes that are involved in the metabolism of less-preferred  
406 carbon sources. To do so, CcpA has to be activated through a cascade of events involving  
407 its co-regulator histidine-containing phosphocarrier protein (HPr), which has been  
408 phosphorylated by its cognate kinase/phosphorylase HprK/P activated in the presence of  
409 glycolytic intermediates. It is thought that binding of the phosphorylated HPr to CcpA  
410 enhances its DNA binding affinity to the *cre* binding site to repress or activate the target  
411 genes. RsaI repression requires the presence of CcpA, most probably through the binding at  
412 a *cre* motif located at -45/-30 (GGAAAACGCTTACAT) from the *rsaI* transcriptional start site  
413 (Figure 1). Interestingly, deletion of *ccpA* gene affected vancomycin resistance (Seidl et al.,  
414 2009) and recent observations showed that sub-inhibitory treatment of cells with vancomycin

415 led to an enhanced expression of RsaI (Howden et al., 2013). We showed that the  
416 repression of RsaI is alleviated as soon as the concentration of glucose is strongly reduced.  
417 Therefore, RsaI might be a signature of a metabolic switch of the bacterial population. Using  
418 the MAPS approach, we could identify several mRNAs that strongly bind to RsaI with its long  
419 unpaired CU-rich region. Among these mRNAs, we show that *glcU\_2* encoding a glucose  
420 permease, *fn3K* encoding the fructosamine 3 kinase, and *treB* encoding a kinase involved in  
421 trehalose transport are all regulating at the translational level by RsaI. This mechanism is  
422 most likely common to all mRNAs that could form base-pairings between their ribosome  
423 binding sites and the CU-rich region of RsaI. This is the case for mRNAs encoding a  
424 transcriptional regulator of the XRE family, the O-methyltransferase RsmG, a peptidase, a  
425 cell wall binding lipoprotein, and DegV containing protein (Table 1). Indeed, these mRNAs  
426 were no more found enriched together with RsaI\_mut 4 in which the CU-rich region has  
427 been deleted (Table S3). Among these proteins, two of them are directly involved in sugar  
428 uptake and metabolism (GlcU\_2, and TreB). In *S. aureus*, the PTS (phosphotransferase  
429 system)-dependent and independent transport systems ensure efficient glucose transport  
430 (reviewed in (Götz et al., 2006). If a rapidly metabolizable sugar (such as glucose) is used  
431 during growth at a rather low concentration, the transport will occur via the PTS system and  
432 concomitantly, the carbon catabolite repression system will be activated through CcpA  
433 protein. At high concentration of glucose, it is assumed that the sugar will be transported by  
434 the PTS system and in addition by the permease GlcU\_2. The glucose transported by the  
435 permease will be phosphorylated within the cell by the glucose kinase GlkA. Hence, it is  
436 reasonable to propose that RsaI would repress the synthesis of GlcU\_2 when the glucose  
437 concentration dropped. RsaI inhibits also key enzymes of the trehalose metabolism (TreB), a  
438 diholoside which is transported exclusively by PTS (Bassias and Brückner, 1998).  
439 Transcriptomic analysis also revealed that RsaI strongly repressed various key enzymes  
440 involved in glucose catabolism pathway such as fructose-biphosphate aldolase (*fba1*), 6-  
441 phosphogluconate dehydrogenase 2C decarboxylase (*gnd*), and the thiamine-dependent  
442 enzyme transketolase (*tkt*). Additionally, we showed that RsaI repressed the synthesis of  
443 fructosamine 3-kinase, which deglycated products of glycation formed from ribose 5-  
444 phosphate or erythrose 4-phosphate produced by the pentose phosphate pathway (Gemayel  
445 et al., 2007). This enzyme is part of a repair machinery to protect the cells from damages  
446 caused by glycation as the results of high glucose concentrations (Deppe et al., 2011). The  
447 pentose phosphate pathway is also an alternative route for glucose metabolism, and  
448 provides the source of pentose phosphates necessary for nucleotide synthesis. Although it is  
449 not known whether RsaI regulated their expression in a direct and indirect manner, base-  
450 pairings were predicted between RsaI and the ribosome binding site of *fba1* and *tkt* mRNAs.  
451 The transketolase is a key enzyme of the pentose phosphate pathway, which requires

452 thiamine diphosphate as a co-factor. Interestingly, the thiamine pathway is also repressed in  
453 strain expressing RsaI (Table S4). Although, we have observed very similar pathways that  
454 are deregulated by RsaI using the MAPS and RNA-seq approaches, not so many overlaps  
455 were identified. It is possible that the conditions of the MAPS approach performed on the  
456 wild type strain expressing all the ribonucleases has preferentially enriched the mRNAs that  
457 are regulated at the translational level. Therefore, it is tempting to deduct that RsaI would  
458 inhibit the synthesis of the major permease of glucose uptake, of enzymes involved in the  
459 glycolysis, of unnecessary enzymes involved in detoxification of high glucose concentration,  
460 and of the pentose phosphate pathway when glucose concentration decreases.

461

### 462 **RsaI interacts with sRNA containing C-rich motifs**

463 The MAPS approach revealed that several sRNAs (RsaG, RsaD, RsaE) bound significantly  
464 to RsaI. We demonstrated here that the second G-track sequence located in the first hairpin  
465 domain of RsaI is responsible for the formation of a highly stable complex with RsaG, and a  
466 less stable complex with RsaD. Additionally, mRNA targets interacting with the CU-rich  
467 domain of RsaI did not disturb the binding of RsaG suggesting that the two functional  
468 domains of RsaI are independent. Conversely, preliminary data suggested that the apical  
469 loop of the first hairpin of RsaG contain the C-rich motif that is recognized by RsaI, but which  
470 is also used to regulate the expression of several mRNAs (Desgranges *et al.*, data not  
471 shown). RsaG is part of the 3'UTR of *uhpT* mRNA, and its expression was strongly  
472 enhanced by the extracellular concentration of G-6P. Under these conditions, the levels of  
473 RsaI are much lower than for RsaG (result not shown). These two sRNAs are thus involved  
474 in pathways related to the use of the preferred carbon sources. Indeed, RsaI negatively  
475 controls glucose uptake when glucose is consumed or absent from the medium while RsaG  
476 responded to the extracellular concentration of G-6P. Although the functions of RsaG  
477 remained to be addressed, we hypothesized that the sRNA might regulate either the  
478 expression of unnecessary genes, or of genes involved in sugar metabolism, or of genes  
479 required to protect cells against damages linked to sugar-phosphate uptake and metabolism  
480 (Bobrovskyy and Vanderpool, 2014). Noteworthy, RsaI sequence is conserved in the genus  
481 of *Staphylococcus* while RsaG is conserved only in the *S. aureus* species.

482 In addition, the overproduction of RsaI induced numerous changes into the  
483 transcriptome of *S. aureus* that resembled the regulon of the two-component system SrrAB,  
484 which was demonstrated as the essential system responding to both nitric oxide (NO) and  
485 hypoxia (Kinkel *et al.*, 2013). The SrrAB regulon has also been shown to confer to the cells  
486 the ability to maintain energy production, to promote repair damages, and NO detoxification  
487 (Kinkel *et al.*, 2013). We observed here that RsaI enhanced the expression of genes  
488 encoding cytochrome biosynthesis (*qoxABCD*), as well as genes involved in anaerobic

489 metabolism (*pflAB*, *ldh1*, *focA*, *adh*), in iron sulfur cluster repair (*scdA*), and most importantly  
490 in NO detoxification (*hmp*). These effects might be indirect due to the interaction between  
491 RsaI and the SrrAB-dependent sRNAs RsaD and RsaE, which both contained a typical *srrA*  
492 site upstream their genes. These two sRNAs present a C-rich sequence that can potentially  
493 form base-pairings with the G-track sequences of RsaI (Table 1), but the formation of  
494 complexes with RsaI is less efficient than with RsaG. It cannot be excluded that an RNA-  
495 binding protein might be required in these cases to facilitate base-pairings. We also do not  
496 exclude that the two sRNAs were pooled down because they might share similar mRNA  
497 targets with RsaI. RsaD and RsaE are both upregulated by the presence of NO in the  
498 cellular medium (Durand et al., 2015; Figure S3D). Although the functions of RsaD requires  
499 additional studies, *S. aureus* RsaE was previously shown to coordinate the downregulation  
500 of numerous metabolic enzymes involved in the TCA cycle and the folate-dependent one-  
501 carbon metabolism (Bohn et al., 2010; Geissmann et al., 2009). Additionally, in *B. subtilis*,  
502 the homologue of RsaE called RoxS is under the control of the NADH-sensitive transcription  
503 factor Rex, and the Rex binding site is also conserved in *S. aureus* *rsaE* gene (Durand et al.,  
504 2017). Hence, it was proposed that RsaE downregulated several enzymes of the central  
505 metabolism under non favorable conditions, and in addition would contribute to readjust the  
506 cellular NAD<sup>+</sup>/NADH balance under stress conditions (Bohn et al., 2010; Durand et al.,  
507 2015; 2017). Many of the RsaI-dependent effects, which have been monitored by the  
508 transcriptomic analysis, are most probably indirect, and we propose that some of these  
509 effects resulted from the interaction of RsaI with sRNAs when the preferred carbon source  
510 became scarce.

511

### 512 **Physiological consequences of RsaI regulation.**

513 We showed here that several sRNAs in *S. aureus* are part of intricate regulatory networks to  
514 interconnect in a dynamic manner various metabolic pathways following sugar metabolism  
515 and uptake. The concept that sRNAs are key actors to coordinate the regulation of metabolic  
516 enzymes has been largely demonstrated for *Enterobacteriaceae* (reviewed in Görke and  
517 Vogel, 2009). These sRNA-dependent regulations often induced significant growth  
518 phenotypes in response to the availability of carbon sources and nutrient. For instance, *E.*  
519 *coli* and *Salmonella* SgrS contributed to stress resistance and growth during glucose-  
520 phosphate stress (reviewed in Bobrovskyy and Vanderpool, 2014), *Salmonella* GcvB  
521 regulon is required for growth if peptides represent the unique carbon source (Miyakoshi et  
522 al., 2015), while *E. coli* Spot42 is important for optimal utilization of carbon sources and its  
523 overproduction inhibited growth, when succinate was the sole carbon source (Møller et al.,  
524 2002). In *S. aureus*, the overproduction of RsaE induced a growth defect, which was partially  
525 alleviated by acetate (Bohn et al., 2010). Therefore, the yields of these sRNAs should be

526 tightly controlled during growth in order to adjust the metabolic pathways, to optimize the use  
527 of the preferred carbon sources, and to avoid cell damages or metabolites depletion caused  
528 by the intracellular production of glucose-phosphate. If RsaI interconnects various metabolic  
529 pathways by acting as a sponge sRNA and as a post-transcriptional regulator, what could be  
530 its function during the infection process? *S. aureus* has the ability to generate infections  
531 through the colonization of many different metabolic host niches. Several studies have  
532 shown that both glycolysis and gluconeogenesis systems are mandatory for the infection  
533 process, and moreover *S. aureus* appears to be resistant to NO radicals that are heavily  
534 produced by the macrophages. Interestingly, glycolysis is an important process that  
535 contributes to persist within the macrophages, and to protect the intracellular bacteria  
536 against NO (Vitko et al., 2015). However, if the bacteria escape the macrophages or lyse the  
537 host cells, *S. aureus* is thought to form aggregates at the centre of highly inflamed and  
538 hypoxic abscesses. Under these conditions, the host cells consumed a large amount of  
539 glucose to fight the inflammation. Hence, glucose will become scarce for *S. aureus*  
540 suggesting that lactate and amino acids derived from the host might be used as the major  
541 sources of carbon to enter gluconeogenesis (Richardson et al., 2015). These conditions  
542 favored the activation of the two-component system SrrAB, which in turn activates genes  
543 required for anaerobic metabolism, cytochrome and heme biosynthesis, and NO radicals  
544 detoxification should play an essential role in the survival of the bacteria (Kinkel et al., 2013).  
545 Because the CcpA-dependent repression of RsaI is alleviated under conditions where the  
546 glucose is strongly reduced, and because many SrrAB-dependent genes are also induced  
547 when RsaI is expressed at high levels, it is thus expected that RsaI might also contribute to  
548 metabolic adaptations of the cells to the dynamic nature of the host immune environment.  
549 Besides, it is also tempting to propose that RsaI might be involved in the dormant state of  
550 bacterial cells while environmental conditions are unfavorable (Lennon and Jones, 2011).  
551 Interestingly enough, we also observed a RsaI-dependent activation of the expression of the  
552 mRNA encoding EsxA, a type VII secreted virulence factor required for the release of the  
553 intracellular *S. aureus* during infection (Korea et al., 2014). We also showed here that RsaI  
554 regulated the synthesis of the PIA-PNAG exopolysaccharide. Although the precise molecular  
555 mechanism is not yet defined, RsaI would modulate the synthesis of the IcaR repressor by  
556 binding to its mRNA or by counteracting an activation factor of *icaR* mRNA translation. The  
557 synthesis of the PIA-PNAG is tightly controlled according to the metabolic states of the  
558 bacterial population. For instance, inactivation of the TCA cycle resulted in a massive  
559 derepression of the PIA-PNAG biosynthetic enzymes to produce the exopolysaccharides  
560 (Sadykov et al., 2008), and that glucose enhances PIA-PNAG dependent biofilm formation  
561 (You et al., 2014), while SrrAB appears as an inducer of PIA-PNAG dependent biofilm  
562 (Ulrich et al., 2007).



563           Although our study shed light on the regulatory activities of this fascinating  
564 multifunctional sRNA, there is still much to be learned on how sRNAs can be integrated into  
565 the networks regulating the metabolic pathways that are essential for *S. aureus* survival,  
566 persistence and invasion within the host.

567

568

## 569 **MATERIAL AND METHODS**

570

### 571 **Plasmids and Strains Constructions**

572 All strains and plasmids constructed in this study are described in Table S1. The  
573 oligonucleotides designed for cloning and for mutagenesis are given in Table S2.  
574 *Escherichia coli* strain DC10B was used as a host strain for plasmid amplification before  
575 electroporation in *S. aureus*. Plasmids were prepared from transformed *E. coli* pellets  
576 following the Nucleospin Plasmid kit protocol (Macherey-Nagel). Transformation of both *E.*  
577 *coli* and *S. aureus* strains was performed by electroporation (Bio-Rad Gene Pulser).

578           The *rsal* deletion mutant was constructed by homologous recombination using  
579 plasmid pMAD in *S. aureus* HG001 and 132 (Arnaud et al., 2004). The deletion comprises  
580 nucleotides 2376101 to 2376306 according to HG001 genome (Caldelari et al., 2017).  
581 Experimental details are given in supplementary materials.

582           The vector pCN51::*Prsal* was constructed by ligating a PCR-amplified fragment  
583 (Table S2) containing *rsal* with 166 pb of its promoter region and digested by *SphI* and *PstI*  
584 into pCN51 vector digested with the same enzymes. The vector pUC::*T7rsal* was  
585 constructed by ligating a PCR-amplified fragment (Table S2) containing *rsal* with the T7  
586 promoter sequence and digested by *EcoRI* and *PstI* into pUC18 vector digested with the  
587 same enzymes. Mutagenesis of pUC::*T7rsal* was performed with Quikchange XL Site-  
588 directed mutagenesis (Stratagene) leading to pUC::*T7rsal* mut1, 2, 3 and 4 (Table S2). To  
589 obtain the plasmid pCN51::P3::MS2-*rsal*, a PCR product containing the MS2 tag fused to  
590 the 5' end of *rsal* was cloned into pCN51::P3 by digestion of both PCR fragments and of the  
591 plasmid by *PstI/BamHI* (Table S2). Plasmids from positive clones were sequenced (GATC  
592 Biotech) before being transformed in DC10B, extracted and electroporated into *S. aureus*  
593 strains. The plasmids pCN51::P3::MS2-*rsal* mut2 and mut4 were generated by Quikchange  
594 mutagenesis as above. Construction of plasmids pES::*rsal* and pES::*rsal* mut5 is described  
595 in supplementary materials.

596

### 597 **Growth conditions**

598 *E. coli* strains were cultivated in Luria-Bertani (LB) medium (1% peptone, 0.5% yeast extract,  
599 1% NaCl) supplemented with ampicillin (100 µg/mL) when necessary. *S. aureus* strains were

600 grown in Brain-Heart Infusion (BHI), Tryptic Soy Broth (TSB) or Muller Hinton Broth (MHB)  
601 media (Sigma-Aldrich) supplemented with erythromycin (10 µg/mL) for plasmid selection.  
602 When needed, MHB was complemented with either 0,15% of D-glucose, 0,5% of glucose 6-  
603 phosphate, 0,10% of fructose or of xylose (Sigma-Aldrich). NO production was induced by  
604 addition of 100 µM Na-diethylamine NONOate (Sigma-Aldrich) as previously described  
605 (Durand et al., 2015).

606

#### 607 **Preparation of total RNA extracts**

608 Total RNAs were prepared from *S. aureus* cultures taken at different times of growth. After  
609 centrifugation, bacterial pellets were resuspended in 1 mL of RNA Pro Solution (MP  
610 Biomedicals). Lysis was performed with FastPrep and RNA purification followed strictly the  
611 procedure described for the FastRNA Pro Blue Kit (MP Biomedicals). Electrophoresis of  
612 either total RNA (10 µg) or MS2-eluted RNA (500 ng) was performed on 1,5% agarose gel  
613 containing 25 mM guanidium thiocyanate. After migration, RNAs were vacuum transferred  
614 on nitrocellulose membrane. Hybridization with specific digoxigenin (DIG)-labeled probes  
615 complementary to RsaI, RsaG, RsaD, 5S, *ccpA* sequences, followed by luminescent  
616 detection was carried out as previously described (Tomasini et al., 2017).

617

#### 618 **MAPS experiments, transcriptomic and RNA-seq analysis**

619 Crude bacterial extract were prepared and purified by affinity chromatography as previously  
620 described (Tomasini et al., 2017). The eluted RNA samples were either used for Northern  
621 blot or treated with DNase I prior to RNA-seq analysis. Isolation of tagged sRNAs and the  
622 co-purified RNAs was performed in duplicates. The experiments were carried out with the  
623 tagged wild type RsaI and two mutant forms (mut2 and mut4). RNAs were treated to deplete  
624 abundant rRNAs, and the cDNA libraries were performed using the ScriptSeq complete kit  
625 (bacteria) from Illumina. The libraries were sequenced using Illumina MiSeq with a V3  
626 Reagent kit (Illumina), which preserves the information about the orientation of the  
627 transcripts and produces reads of 150 nts, which map on the complementary strand. Each  
628 RNA-seq was performed at least in duplicates. The reads were then processed to remove  
629 adapter sequences and poor quality reads by Trimmomatic (Bolger et al., 2014), converted  
630 to the FASTQ format with FASTQ Groomer (Blankenberg et al., 2010), and aligned on the  
631 HG001 genome (Caldelari et al., 2017) using BOWTIE2 (Langmead et al., 2009). Finally, the  
632 number of reads mapping to each annotated feature has been counted with HTSeq (Anders  
633 et al., 2015) using the interception non-empty protocol. To estimate the enrichment values  
634 for the MAPS experiment or the differential expression analysis for the transcriptomic  
635 experiment, we used DEseq2 (Varet et al., 2016). The statistical analysis process includes  
636 data normalization, graphical exploration of raw and normalized data, test for differential

637 expression for each feature between the conditions, raw p-value adjustment, and export of  
638 lists of features having a significant differential expression (threshold p-value=0.05; fold  
639 change threshold=2) between the conditions. All processing steps were performed using the  
640 Galaxy platform (Afgan et al., 2016).

641 For total RNA extracts and MS2-eluted RNAs, DNase I (0.1 U/ $\mu$ L) treatment was  
642 performed 1h at 37°C. The reactions mixtures were then purified by phenol::chloroform::  
643 isoamylalcohol 25:24:1 (v/v) and subsequent ethanol precipitation. RNA pellets were re-  
644 suspended in sterile milliQ water. RNA was quantified by Qubit (Life Technologies) and the  
645 integrity was assessed with the Bioanalyzer (Agilent Technologies). For transcriptomic, 1  $\mu$ g  
646 of total RNA was ribo-depleted with the bacterial RiboZero kit from Illumina. The TruSeq  
647 total RNA stranded kit from Illumina was used for the library preparation. Library quantity  
648 was measured by Qubit and its quality was assessed with a TapeStation on a DNA High  
649 sensitivity chip (Agilent Technologies). Libraries were pooled at equimolarity and loaded at  
650 7 pM for clustering. The 50 bases oriented single-read sequencing was performed using  
651 TruSeq SBS HS v3 chemistry on an Illumina HiSeq 2500 sequencer.

652

### 653 **Preparation of RNAs for *in vitro* experiments**

654 Transcription of RsaI, RsaI mutants and RsaG was performed using linearized pUC18  
655 vectors. PCR fragments containing the 5'UTR of the coding region of selected mRNA targets  
656 were directly used as templates for *in vitro* transcription using T7 RNA polymerase. The  
657 RNAs were then purified using a 6% or 8% polyacrylamide-8 M urea gel electrophoresis.  
658 After elution with 0.5 M ammonium acetate pH 6.5 containing 1 mM EDTA, the RNAs were  
659 precipitated in cold absolute ethanol, washed with 85% ethanol and vacuum-dried. The  
660 labeling of the 5' end of dephosphorylated RNAs (RsaI/RsaI mutants) and DNA  
661 oligonucleotides were performed with T4 polynucleotide kinase (Fermentas) and [ $\gamma$  <sup>32</sup>P] ATP.  
662 Before use, cold or labeled RNAs were renatured by incubation at 90°C for 1 min in 20 mM  
663 Tris-HCl pH 7.5, cooled 1 min on ice, and incubated 10 min at 20°C in ToeP+ buffer (20 mM  
664 Tris-HCl pH 7.5, 10 mM MgCl<sub>2</sub>, 60 mM KCl, 1 mM DTT).

665

### 666 **Gel Retardation Assays**

667 Radiolabeled purified RsaI or RsaI mutants (50000 cps/sample, concentration < 1 pM) and  
668 cold mRNAs were renatured separately as described above. For each experiment,  
669 increasing concentrations of cold mRNAs were added to the 5' end labeled wild type or RsaI  
670 mutants in a total volume of 10  $\mu$ l containing the ToeP+ buffer. Complex formation was  
671 performed at 37°C during 15 min. After incubation, 10  $\mu$ L of glycerol blue was added and the  
672 samples were loaded on a 6% or 8 % polyacrylamide gel under non-denaturing conditions

673 (300 V, 4°C). Under these conditions where the concentration of the labeled RNA is  
674 negligible, the  $K_D$  dissociation constant can be estimated as the concentration of the cold  
675 RNA that showed 50% of binding.

676

### 677 **Toe-printing assays**

678 The preparation of *E. coli* 30S subunits, the formation of a simplified translational initiation  
679 complex with mRNA, and the extension inhibition conditions were performed as previously  
680 described (Fechter et al., 2009). Increasing concentrations of RsaI were used to monitor  
681 their effects on the formation of the initiation complex with *glcU\_2* and *fn3K* mRNAs.

682

### 683 ***In vivo* $\beta$ -galactosidase assays**

684 Translation fusions were constructed with plasmid pLUG220, a derivative of pTCV-*lac*, a  
685 low-copy-number promoter-less *lacZ* vector, containing the constitutive *rpoB* promoter  
686 (Table S1). The whole leader regions of *glcU\_2* (-54/+99), *fn3K* (-33/+99), *treB* (-23/+99),  
687 HG001\_01242 (-34/+99), and HG001\_02520 (-71/+99) (Table S2) were cloned downstream  
688 the *PrpoB* in frame with *lacZ*. The whole gene encoding RsaI with 166 bp of its promoter  
689 region was digested with *PstI* and ligated at the unique *PstI* of pLUG220::*PrpoB* vector. The  
690 final constructs were transformed into the strain HG001 $\Delta$ *rsal*.  $\beta$ -galactosidase activity was  
691 measured four times as previously described (Tomasini et al., 2017).

692

### 693 **PIA-PNAG quantification.**

694 Cell surface PIA-PNAG exopolysaccharide levels were monitored according to (Cramton et  
695 al., 1999). Overnight cultures were diluted 1:50 in TSB-3% NaCl and bacteria were grown at  
696 37°C. Samples were extracted at 6 h after inoculation. The same number of cells of each  
697 strain was resuspended in 50  $\mu$ l of 0.5 M EDTA (pH 8.0). Then, cells were incubated for  
698 5 min at 100°C and centrifuged 17,000 g for 5 min. Supernatants (40  $\mu$ l) was incubated with  
699 10  $\mu$ l of proteinase K (20 mg/ml) (Sigma) for 30 min at 37°C. After the addition of 10  $\mu$ l of the  
700 buffer (20 mM Tris-HCl pH 7.4, 150 mM NaCl, 0.01% bromophenol blue), serial dilutions  
701 1:25 were performed in the same buffer. Then, 10  $\mu$ l were spotted on a nitrocellulose  
702 membrane using a Bio-Dot microfiltration apparatus (Bio-Rad). The membrane was blocked  
703 overnight with 5% skimmed milk in phosphate-buffered saline (PBS) with 0.1% Tween 20,  
704 and incubated for 2 h with specific anti-PNAG antibodies diluted 1:20,000 (Maira-Litrán et al.,  
705 2005). Bound antibodies were detected with peroxidase-conjugated goat anti-rabbit  
706 immunoglobulin G antibodies (Jackson ImmunoResearch Laboratories, Inc., Westgrove, PA)  
707 diluted 1:10,000, using the SuperSignal West Pico Chemiluminescent Substrate (Thermo  
708 Scientific).

709

## 710 **ACKNOWLEDGEMENTS**

711 We thank Thomas Geissmann for helpful advices and discussions, Marie Beaume for the  
712 construction of the mutant strain HG001- $\Delta$ rsal, and Eve-Julie Bonetti and Anne-Catherine  
713 Helfer for excellent technical assistance. We are grateful to Joseph Vilardell for the gift of the  
714 plasmid expressing the MS2-MBP, Aurélia Hiron and Tarek Masdek for providing us the  
715 HG001- $\Delta$ hptRS and - $\Delta$ srrAB mutant strains, and Christiane Wolz for the HG001- $\Delta$ ccpA and -  
716  $\Delta$ codY mutant strain. RNAseq analyses have been partially done using the Roscoff (France)  
717 instance of Galaxy (<http://galaxy.sb-roscoff.fr/>).

718

## 719 **FUNDING**

720 This work was supported by the Centre National de la Recherche Scientifique (CNRS) to  
721 [P.R.] and by the Agence Nationale de la Recherche (ANR, grant ANR-16-CE11-0007-01,  
722 RIBOSTAPH, to [P.R.]). It has also been published under the framework of the LABEX:  
723 ANR-10-LABX-0036 NETRNA to [P.R.], a funding from the state managed by the French  
724 National Research Agency as part of the investments for the future program. D. Bronesky  
725 was supported by Fondation pour la Recherche Médicale (FDT20160435025). A. Toledo-  
726 Arana is financed by the Spanish Ministry of Economy and Competitiveness (BFU2014-  
727 56698-P).

728

## 729 **REFERENCES**

- 730 Afgan, E., Baker, D., van den Beek, M., Blankenberg, D., Bouvier, D., Čech, M., Chilton, J.,  
731 Clements, D., Coraor, N., Eberhard, C., et al. (2016). The Galaxy platform for accessible,  
732 reproducible and collaborative biomedical analyses: 2016 update. *Nucleic Acids Res.* *44*,  
733 gkw343.
- 734
- 735 Anders, S., Pyl, P.T., and Huber, W. (2015). HTSeq-A Python framework to work with high-  
736 throughput sequencing data. *Bioinformatics* *31*, 166–169.
- 737
- 738 Arnaud, M., Chastanet, A., and Débarbouillé, M. (2004). New vector for efficient allelic  
739 replacement in naturally nontransformable, low-GC-content, gram-positive bacteria. *Appl.*  
740 *Environ. Microbiol.* *70*, 6887–6891.
- 741
- 742 Bassias, J., and Brückner, R. (1998). Regulation of lactose utilization genes in  
743 *Staphylococcus xylosus*. *J. Bacteriol.* *180*, 2273–2279.
- 744
- 745 Bischoff, M., Wonnenberg, B., Nippe, N., Nyffenegger-Jann, N.J., Voss, M., Beisswenger, C.,  
746 Sunderkötter, C., Molle, V., Dinh, Q.T., Lammert, F., Bals, R., Herrmann, M., Somerville, G.A.,  
747 Tschernig, T., Gaupp, R., (2017) CcpA Affects Infectivity of *Staphylococcus aureus* in a  
748 Hyperglycemic Environment. *Front Cell Infect Microbiol.* *9*; 7:172
- 749
- 750 Blankenberg, D., Gordon, A., Von Kuster, G., Coraor, N., Taylor, J., Nekrutenko, A., and  
751 Team, G. (2010). Manipulation of FASTQ data with galaxy. *Bioinformatics* *26*, 1783–1785.
- 752

- 753 Bobrovskyy, M., and Vanderpool, C.K. (2014). The small RNA SgrS: roles in metabolism  
754 and pathogenesis of enteric bacteria. *Front. Cell. Infect. Microbiol.* **4**, 61.  
755
- 756 Bohn, C., Rigoulay, C., Chabelskaya, S., Sharma, C.M., Marchais, A., Skorski, P., Borezée-  
757 Durant, E., Barbet, R., Jacquet, E., Jacq, A., et al. (2010). Experimental discovery of small  
758 RNAs in *Staphylococcus aureus* reveals a riboregulator of central metabolism. *Nucleic Acids*  
759 *Res.* **38**, 6620–6636.  
760
- 761 Bolger, A.M., Lohse, M., and Usadel, B. (2014). Trimmomatic: A flexible trimmer for Illumina  
762 sequence data. *Bioinformatics* **30**, 2114–2120.  
763
- 764 Caldelari, I., Chane-Woon-Ming, B., Noirot, C., Moreau, K., Romby, P., Gaspin, C. and Marzi,  
765 S. Complete genome sequence and annotation of the *Staphylococcus aureus* strain  
766 HG001. *Genome Announc.* **5**:e00783-17.  
767
- 768 Cramton, S.E., Gerke, C., Schnell, N.F., Nichols, W.W., and Götz, F. (1999). The  
769 Intercellular Adhesion (*ica*) Locus Is Present in *Staphylococcus aureus* and Is Required for  
770 Biofilm Formation. *Infect. Immun.* **67**, 5427–5433.  
771
- 772 Deppe, V.M., Bongaerts, J., O'Connell, T., Maurer, K.H., and Meinhardt, F. (2011).  
773 Enzymatic deglycation of Amadori products in bacteria: Mechanisms, occurrence and  
774 physiological functions. *Appl. Microbiol. Biotechnol.* **90**, 399–406.  
775
- 776 Durand, S., Braun, F., Lioliou, E., Romilly, C., Helfer, A.C., Kuhn, L., Quittot, N., Nicolas, P.,  
777 Romby, P., and Condon, C. (2015). A nitric oxide regulated small RNA controls expression  
778 of genes involved in redox homeostasis in *Bacillus subtilis*. *PLoS Genet.* **11**, e1004957.  
779
- 780 Durand, S., Braun, F., Helfer, A.C., Romby, P., and Condon, C. (2017). sRNA-mediated  
781 activation of gene expression by inhibition of 5'-3' exonucleolytic mRNA degradation. *Elife* **6**.  
782
- 783 Fechter, P., Chevalier, C., Yusupova, G., Yusupov, M., Romby, P., and Marzi, S. (2009).  
784 Ribosomal initiation complexes probed by toeprinting and effect of trans-acting translational  
785 regulators in bacteria. *Methods Mol. Biol.* **540**, 247–263.  
786
- 787 Geissmann, T., Chevalier, C., Cros, M.J., Boisset, S., Fechter, P., Noirot, C., Schrenzel, J.,  
788 François, P., Vandenesch, F., Gaspin, C., et al. (2009). A search for small noncoding RNAs  
789 in *Staphylococcus aureus* reveals a conserved sequence motif for regulation. *Nucleic Acids*  
790 *Res.* **37**, 7239–7257.  
791
- 792 Gemayel, R., Fortpied, J., Rzem, R., Vertommen, D., Veiga-da-Cunha, M., and Van  
793 Schaftingen, E. (2007). Many fructosamine 3-kinase homologues in bacteria are  
794 ribulosamine/ erythrulosamine 3-kinases potentially involved in protein deglycation. *FEBS J.*  
795 **274**, 4360–4374.  
796
- 797 Götz, F., Bannerman, T., and Schleifer, K. (2006). The Genera *Staphylococcus* and  
798 *Micrococcus*. *The prokaryotes*, 5-75  
799
- 800 Herbert, S., Ziebandt, A.K., Ohlsen, K., Schäfer, T., Hecker, M., Albrecht, D., Novick, R., and  
801 Götz, F. (2010). Repair of global regulators in *Staphylococcus aureus* 8325 and comparative  
802 analysis with other clinical isolates. *Infect. Immun.* **78**, 2877–2889.  
803
- 804 Howden, B.P., Beaume, M., Harrison, P.F., Hernandez, D., Schrenzel, J., Seemann, T.,  
805 Francois, P., and Steinar, T.P. (2013). Analysis of the small RNA transcriptional response in  
806 multidrug-resistant *Staphylococcus aureus* after antimicrobial exposure. *Antimicrob. Agents*  
807 *Chemother.* **57**, 3864–3874.

- 808  
809 Kinkel, T.L., Roux, C.M., Dunman, P.M., and Fang, F.C. (2013). The *Staphylococcus aureus*  
810 SrrAB two-component system promotes resistance to nitrosative stress and hypoxia. *MBio* 4.  
811
- 812 Korea, C.G., Balsamo, G., Pezzicoli, A., Merakou, C., Tavarini, S., Bagnoli, F., Serruto, D.,  
813 and Unnikrishnan, M. (2014). Staphylococcal Esx proteins modulate apoptosis and release  
814 of intracellular *Staphylococcus aureus* during infection in epithelial cells. *Infect. Immun.* 82,  
815 4144–4153.
- 816  
817 Lalaouna, D., Carrier, M.C., Semsey, S., Brouard, J.S., Wang, J., Wade, J.T., and Massé, E.  
818 (2015). A 3' external transcribed spacer in a tRNA transcript acts as a sponge for small  
819 RNAs to prevent transcriptional noise. *Mol. Cell* 58, 393–405.
- 820  
821 Langmead, B., Trapnell, C., Pop, M., and Salzberg, S.L. (2009). Bowtie: An ultrafast  
822 memory-efficient short read aligner. [<http://bowtie.cbcb.umd.edu/>]. *Genome Biol.* R25.  
823
- 824 Lennon, J.T., and Jones, S.E. (2011). Microbial seed banks: the ecological and evolutionary  
825 implications of dormancy. *Nat. Rev. Microbiol.* 9, 119–130.
- 826  
827 Li, C., Sun, F., Cho, H., Yelavarthi, V., Sohn, C., He, C., Schneewind, O., and Bae, T. (2010).  
828 CcpA mediates proline auxotrophy and is required for *Staphylococcus aureus* pathogenesis.  
829 *J. Bacteriol.* 192, 3883–3892.
- 830  
831 Maira-Litrán, T., Kropec, A., Goldmann, D.A., Pie,r G.B. (2005) Comparative opsonic and  
832 protective activities of *Staphylococcus aureus* conjugate vaccines containing native or  
833 deacetylated Staphylococcal Poly-N-acetyl-beta-(1-6)-glucosamine. *Infection and Immunity*  
834 73: 6752–6762.
- 835  
836 Majerczyk, C.D., Dunman, P.M., Luong, T.T., Lee, C.Y., Sadykov, M.R., Somerville, G.A.,  
837 Bodi, K., and Sonenshein, A.L. (2010). Direct targets of CodY in *Staphylococcus aureus*. *J.*  
838 *Bacteriol.* 192, 2861–2877.
- 839  
839 Marchais, A., Bohn, C., Bouloc, P., and Gautheret, D. (2010). RsaOG, a new *staphylococcal*  
840 family of highly transcribed non-coding RNA. *RNA Biol.* 7, 116–119.
- 841  
842 Miyakoshi, M., Chao, Y., and Vogel, J. (2015). Cross talk between ABC transporter mRNAs  
843 via a target mRNA-derived sponge of the GcvB small RNA. *EMBO J.* 34, 1478–1492.
- 844  
845 Møller, T., Franch, T., Udesen, C., Gerdes, K., and Valentin-Hansen, P. (2002). Spot 42  
846 RNA mediates discoordinate expression of the *E. coli* galactose operon. *Genes Dev.* 16,  
847 1696–1706.
- 848  
849 Novick, R.P. (2003). Autoinduction and signal transduction in the regulation of  
850 *staphylococcal* virulence. *Mol. Microbiol.* 48, 1429–1449.
- 851  
852  
853 Park, J.Y., Kim, J.W., Moon, B.Y., Lee, J., Fortin, Y.J., Austin, F.W., Yang, S.J., and Seo,  
854 K.S. (2015). Characterization of a novel two-component regulatory system, HptRS, the  
855 regulator for the hexose phosphate transport system in *Staphylococcus aureus*. *Infect.*  
856 *Immun.* 83, 1620–1628.
- 857  
858 Pohl, K., Francois, P., Stenz, L., Schlink, F., Geiger, T., Herbert, S., Goerke, C., Schrenzel,  
859 J., and Wolz, C. (2009). CodY in *Staphylococcus aureus*: A regulatory link between  
860 metabolism and virulence gene expression. *J. Bacteriol.* 191, 2953–2963.

- 861  
862 Richardson, A.R., Somerville, G.A., and Sonenshein, A.L. (2015). Regulating the  
863 Intersection of Metabolism and Pathogenesis in Gram-positive Bacteria. *Microbiol. Spectr.* **3**,  
864 1–27.
- 865  
866 Ruiz de los Mozos, I., Vergara-Irigaray, M., Segura, V., Villanueva, M., Bitarte, N.,  
867 Saramago, M., Domingues, S., Arraiano, C.M., Fechter, P., Romby, P., et al. (2013). Base  
868 Pairing Interaction between 5'- and 3'-UTRs Controls *icaR* mRNA Translation in  
869 *Staphylococcus aureus*. *PLoS Genet.* **9**.
- 870  
871 Sadykov, M.R., Olson, M.E., Halouska, S., Zhu, Y., Fey, P.D., Powers, R., and Somerville,  
872 G.A. (2008). Tricarboxylic acid cycle-dependent regulation of *Staphylococcus epidermidis*  
873 polysaccharide intercellular adhesin synthesis. *J. Bacteriol.* **190**, 7621–7632.
- 874  
875 Seidl, K., Stucki, M., Ruegg, M., Goerke, C., Wolz, C., Harris, L., Berger-Bächli, B., and  
876 Bischoff, M. (2006). *Staphylococcus aureus* CcpA affects virulence determinant production  
877 and antibiotic resistance. *Antimicrob. Agents Chemother.* **50**, 1183–1194.
- 878  
879 Seidl, K., Bischoff, M., and Berger-Bächli, B. (2008a). CcpA mediates the catabolite  
880 repression of *tst* in *Staphylococcus aureus*. *Infect. Immun.* **76**, 5093–5099.
- 881  
882 Seidl, K., Goerke, C., Wolz, C., Mack, D., Berger-Bächli, B., and Bischoff, M. (2008b).  
883 *Staphylococcus aureus* CcpA affects biofilm formation. *Infect. Immun.* **76**, 2044–2050.
- 884  
885 Seidl, K., Müller, S., François, P., Kriebitzsch, C., Schrenzel, J., Engelmann, S., Bischoff, M.,  
886 and Berger-Bächli, B. (2009). Effect of a glucose impulse on the CcpA regulon in  
887 *Staphylococcus aureus*. *BMC Microbiol.* **9**, 95.
- 888  
889 Somerville, G.A., and Proctor, R.A. (2009). At the crossroads of bacterial metabolism and  
890 virulence factor synthesis in *staphylococci*. *Microbiol.Mol.Biol.Rev.* **73**, 233–248.
- 891  
892 Tomasini, A., Moreau, K., Chicher J., Geissmann, T., Vandenesch, F., Romby, P., Marzi, S.,  
893 Caldelari, I. (2017) The RNA targetome of *Staphylococcus aureus* non-coding RNA RsaA:  
894 impact on cell surface properties and defense mechanisms. *Nucleic Acids Research.* Jun  
895 **20**;45(11):6746-6760.
- 896  
897 Ulrich, M., Bastian, M., Cramton, S.E., Ziegler, K., Pragman, A.A., Bragonzi, A., Memmi, G.,  
898 Wolz, C., Schlievert, P.M., Cheung, A., et al. (2007). The staphylococcal respiratory  
899 response regulator SrrAB induces *ica* gene transcription and polysaccharide intercellular  
900 adhesin expression, protecting *Staphylococcus aureus* from neutrophil killing under  
901 anaerobic growth conditions. *Mol. Microbiol.* **65**, 1276–1287.
- 902  
903 Varet, H., Brillet-Guéguen, L., Coppée, J.Y., and Dillies, M.A. (2016). SARTools: A DESeq2-  
904 and edgeR-based R pipeline for comprehensive differential analysis of RNA-Seq data. *PLoS*  
905 *One* **11**.
- 906  
907 Vitko, N.P., Spahich, N.A., and Richardson, A.R. (2015). Glycolytic dependency of high-level  
908 nitric oxide resistance and virulence in *Staphylococcus aureus*. *MBio* **6**.
- 909  
910 Vitko, N.P., Grosser, M.R., Khatri, D., Lance, T.R., and Richardson, A.R. (2016). Expanded  
911 glucose import capability affords *Staphylococcus aureus* optimized glycolytic flux during  
912 infection. *MBio* **7**
- 913  
914 You, Y., Xue, T., Cao, L., Zhao, L., Sun, H., and Sun, B. (2014). *Staphylococcus aureus*  
915 glucose-induced biofilm accessory proteins, GbaAB, influence biofilm formation in a PIA-



916 dependent manner. *Int. J. Med. Microbiol.* 304, 603–612.

917 **FIGURES LEGENDS**

918

919 **Figure 1: RsaI responds to glucose through the transcriptional factor CcpA. (A)**  
920 Northern blot experiments show the expression of RsaI during growth phase in the HG001  
921 strain in MHB medium with or without the addition of 1,5 g/L of D-glucose at the beginning of  
922 growth (middle panel) or after 3 h of growth (right panel). **(B)** Growth curves of HG001 in  
923 MHB or BHI. **(C)** Northern blot experiment shows the expression of RsaI during growth  
924 phase in the HG001,  $\Delta ccpA$  mutant strain, and  $\Delta codY$  mutant strain, in MHB medium with or  
925 without the addition of 1,5 g/L of D-glucose. **(D)** Northern blot experiment shows the  
926 expression of RsaI in the HG001 and  $\Delta ccpA$  mutant strains. Total RNA was prepared after 2,  
927 3, 4, 5 and 6 h of culture in BHI medium at 37°C. **(E)** Northern blot analysis of RsaI in MHB  
928 medium with or without the addition of 1,5 g/L of glucose, fructose or xylose. For all the  
929 experiments shown in panels A and C to E, loading controls were done based on the  
930 expression of 5S rRNA (5S) revealed after hybridization of the membranes with a specific  
931 oligonucleotide. However for these controls, we used aliquots of the same RNA preparations  
932 but the migration of RNA samples was performed in parallel to the experiments on a  
933 separate agarose gel.

934

935 **Figure 2: RsaI binds to *icaR*, *glcU\_2*, *fn3K* mRNA and the sRNA RsaG. (A)** Secondary  
936 structure model of RsaI. In red, are the nucleotides deleted in the RsaI mutants (mut1 to  
937 mut4). The potential base-pairings between RsaI and RsaG are shown. Squared nucleotides  
938 are conserved sequences in RsaI. **(B)** Gel retardation assays show the formation of the  
939 complex between RsaI and *icaR*, *glcU\_2* and *fn3K*. The 5' end-labeled wild-type RsaI (RsaI),  
940 RsaI mutant 3 (RsaI mut3), and RsaI mutant 4 (RsaI mut4) were incubated with increasing  
941 concentration of mRNAs: lane 1, 10 nM; lane 2, 20 nM; lane 3, 50 nM; lane 4, 100 nM and  
942 lane 5, 200 nM. **(C)** Gel retardation assays show the formation of the complex between RsaI  
943 and RsaG. The 5' end-labeled wild-type RsaI (RsaI), RsaI mutant 2 (RsaI mut2), RsaI  
944 mutant 4 (RsaI mut4), and RsaI mutant 1 (RsaI mut1) were incubated with increasing  
945 concentrations of RsaG given in nM on the top of the autoradiographies.

946

947 **Figure 3: RsaI inhibits *glcU\_2* and *fn3K* translation. (A)** Toe-print assay showing the  
948 effect of RsaI on the formation of the ribosomal initiation complex of *glcU\_2* and *fn3K*  
949 respectively. Lane 1 : incubation control of mRNA ; lane 2 : incubation control of mRNA with  
950 30S subunits; lane 3 : formation of the ribosomal initiation complex containing mRNA, 30S  
951 and the initiator tRNA<sup>Met</sup> (tRNA<sup>i</sup>); lane 4: incubation control of mRNA with RsaI; lane 5 to 9 :  
952 formation of the initiation complex in the presence of increasing concentrations of RsaI,  
953 respectively : 50, 100, 150, 300 and 400 nM. Lanes U, A, C, G: sequencing ladders. The

954 Shine and Dalgarno (SD) sequence, the start site of translation (A +1 of the AUG initiation  
955 codon) and the toe-printing signals (N+16) are indicated. **(B)** The  $\beta$ -galactosidase activity  
956 (Miller Units) have been measured from *PrpoB::glcU::lacZ::Prsal*, *PrpoB::fn3K::lacZ::Prsal*,  
957 *PrpoB::treB::lacZ::Prsal* and *PrpoB::HG001\_2520::lacZ::Prsal* expressed in the mutant  
958 strain HG001- $\Delta$ rsal. The  $\beta$ -galactosidase activity was normalized for bacterial density and  
959 the results represented the mean of four independent experiments. \*  $p < 0.05$ , \*\*  $p < 0.005$ ,  
960 \*\*\*  $p < 0.0005$ , \*\*\*\*  $p < 0.0001$ .

961

962 **Figure 4: Interaction of RsaI to *icaR* mRNA induces biofilm production** **(A)** Gel  
963 retardation assays show the formation of the complex between RsaI and *icaR* full length,  
964 *icaR* SUBST, *icaR*-5' UTR, and *icaR*-3' UTR. The 5' end-labeled of RsaI was incubated with  
965 increasing concentrations of mRNAs. UTR is for untranslated region. SUBST stands for the  
966 substitution of UCCCCUG sequence by AGGGGAC, located in the 3'UTR of *icaR*  
967 significantly destabilizing the long-range interaction to enhance *icaR* translation **(B)** *In vivo*  
968 effects of RsaI on PIA-PNAG synthesis in the *S. aureus* wild-type (WT) 132 strain, the  $\Delta$ rsal  
969 mutant and the strain with a deletion of *icaR* 3' UTR ( $\Delta$ 3'UTR) containing the pES plasmids  
970 with *rsal* and *rsal* mut5. Quantification of PIA-PNAG exopolysaccharide biosynthesis using  
971 dot-blot assays. Serial dilutions (1/5) of the samples were spotted onto nitrocellulose  
972 membranes and PIA-PNAG production was detected with specific anti-PIA-PNAG  
973 antibodies. RsaI was detected in the same samples by Northern blot using a probe directed  
974 against RsaI. Ethidium bromide staining of rRNA was used as loading control.

975

976 **Figure 5: Regulatory function of RsaI is not impaired by binding of RsaG.** **(A)** Ternary  
977 complex formation between RsaI, mRNA target *glcU\_2*, *HG001\_00942* and *HG001\_1242*,  
978 and RsaG. The 5'-end labeled RsaI was incubated with increasing concentrations of *glcU\_2*  
979 alone, or in the presence of 50 nM of RsaG. **(B)** Northern blots experiments have been used  
980 to monitor the half-lives of RsaI and RsaG in either HG001- $\Delta$ rsaG or HG001- $\Delta$ rsal mutant  
981 strains. The cells were treated with rifampicin at 4h of growth and total RNAs were extracted  
982 after 2, 4, 8, 15, 30 and 60 minutes at 37°C in BHI. 5S rRNA was probed to quantify the yield  
983 of RNA in each lane using the same samples but run on two different gels.

984

985 **Figure 6: Schematic drawing summarizing the regulatory networks involving the bi-**  
986 **functional RsaI and its mRNA targets in *Staphylococcus aureus*.** Arrows are for  
987 activation, bars for repression. In blue, are the transcriptional protein regulators, and in red  
988 the regulatory sRNAs. Red lines corresponded to post-transcriptional regulation and black

989 lines to transcriptional regulation. Dotted line represented the regulatory events for which  
990 direct regulation is not yet demonstrated.

991 **Table 1: *In silico* predictions of base-pairing interactions for selected RNAs found by MAPS with MS2-RsaI**  
 992

| Target      | Product                                                                                 | Base-pairing prediction                                                                                                                                                                                       | $\Delta G$<br>(kcal/<br>mol) | Fold<br>change*<br>MS2-<br>RsaI/MS2 | Interac-<br>tions | Fold<br>change<br>$\Delta$ rsal/W<br>T |
|-------------|-----------------------------------------------------------------------------------------|---------------------------------------------------------------------------------------------------------------------------------------------------------------------------------------------------------------|------------------------------|-------------------------------------|-------------------|----------------------------------------|
| HG001_02704 | IcaR<br>Biofilm operon <i>icaADBC</i><br>HTH-type negative<br>transcriptional regulator | 1382 GGAAAGUAUAAGUAAUAAUUUAUUGAUAGCGCCUAUGUGAUG 1425<br>104 CCUUUCAU---UCAUUUUU-AUAACUUCUACA----ACACUAC 69<br>41 AGAAGGGGU AUGACGGUACAACAC-UUGAUGAUU 74 coding<br>109 UCUUUCUUCU-UCAUUAUUUAUACUUCUACA 76 RsaI | -16,16                       | 33,976                              | i                 | 0,807                                  |
| HG001_02520 | XRE family transcriptional<br>regulator                                                 | -58 AAUAGAGAGAGACGAGAGAGUU<br>113 UUUUUCUUUC-CU-UUCAUUCU<br>-21 AUAAACAUUGGAG-UGA--UGAUUUG +3<br>92 UAUUUUAACUUCUACAACACUACA 66                                                                               | -12,08                       | 22,978                              | i                 | 0,698                                  |
| HG001_01242 | Hypothetical protein                                                                    | -29 AAGGAAAGUAAUGAAUAAA---GGAGAUG +3<br>106 UUCUUUCAUU-CAUUUUUAUACUUCUACA 76                                                                                                                                  | -16,27                       | 17,369                              | i                 | 0,849                                  |
| HG001_02756 | RsaG                                                                                    | 43 CUACCCUU 50<br>32 GAUGGGGA 25                                                                                                                                                                              | -8,82                        | 13,621                              | i                 | 1,021                                  |
| HG001_02360 | GlvR                                                                                    | 602 UACCCUU+608<br>31 AUGGGGA 25                                                                                                                                                                              | -6,78                        | 9,961                               | ni                | 0,724                                  |
| HG001_01537 | RsmG<br>Putative O-<br>methyltransferase                                                | -22 GGGGAUCCAGCAGUAGUAAUGUUGUGAAU +8<br>106 UUCUUUCAU-UCAUUUUU-UAUA-ACUUC 80                                                                                                                                  | -9,74                        | 7,137                               | i                 | 0,987                                  |
| HG001_02609 | <i>isaA</i>                                                                             | 741 UAUUAGCUCU-UCCC 755<br>41 AUUAUCGAGAUUGGGG 26                                                                                                                                                             | -11,36                       | 6,76                                | ni                | 1,008                                  |
| HG001_00847 | RsaE                                                                                    | 59 CCCCUUUCU 68<br>29 GGGGAAACAA 20                                                                                                                                                                           | -14,21                       | 5,476                               | ni                | 0,899                                  |
| HG001_02545 | Hypothetical protein                                                                    | -2 AAUGGAAAGAAUUUGAAGUAAU +21<br>113 UUUUUCUUUCUUUCAUUA 91                                                                                                                                                    | -11,16                       | 5,262                               | i                 | 0,950                                  |

993

|             |                                              |                                                                                                       |        |       |    |       |
|-------------|----------------------------------------------|-------------------------------------------------------------------------------------------------------|--------|-------|----|-------|
| HG001_00316 | Peptidase propeptide and YPEB domain protein | -23 <b>AAAUAGGAAGAGAGAGUGAUAUUATG</b> +3<br>113 <b>UUUAUCUUUC-CUUUCAUUCAUUAUU</b> 89                  | -15,55 | 5,234 | i  | 1,094 |
| HG001_02210 | Hypothetical protein                         | -26 <b>AAAUUUUAAAGGAUGU</b> -10<br>90 <b>UUUAUAAC--UUCUACA</b> 76                                     | -8,33  | 4,978 | ni | 1,186 |
| HG001_02293 | GlcU_2 putative glucose uptake protein       | -25 <b>AAAUAGUAUAGGAGAGUGAGUAGUCUUG</b> +3<br>113 <b>UUUAUCUU-UCCUUUCAUUCAUUAUUUA</b> 87              | -18,25 | 4,769 | i  | 1,093 |
| HG001_00974 | Hypothetical protein                         | 401 <b>CUACCCU</b> 407<br>32 <b>GAUGGGG</b> 26                                                        | -7,18  | 4,532 | ni | 1,077 |
| HG001_02628 | Fn3K Fructosamine Kinase                     | -24 <b>UAAGUAGAUUGGAAGGUGUUUGU-AUGAUG</b> +7<br>114 <b>GUUUUAUCUUCCUUUCAU--CAUUAUUUAU</b> 86          | -16,44 | 4,37  | i  | 1,077 |
| HG001_00942 | Putative cell wall binding lipoprotein       | -24 <b>AAAUAGCAAGUGGAGGUACAAGUAUGAAAUUUGGA</b> 12<br>113 <b>UUUAUCUUUC-CUUUCAU--UCAUUUUUAUAAUU</b> 81 | -16,06 | 4,091 | i  | 1,02  |
| HG001_00584 | RsaD                                         | 42 <b>CUCCUUUGU</b> 50<br>29 <b>GGGGAAACA</b> 21                                                      | -7,97  | 4,078 | i  | 1,046 |

994

995 \*p<0,000005

996 The red bases indicate base-pairing interactions. In green are shown the Shine and Dalgarno sequence and the translation start codon AUG

997 (UUG for *glcU\_2* mRNA).  $\Delta G$  for RNA hybrids were predicted with IntaRNA. n.i means no interaction and i for direct validated interaction by

998 EMSA.

999 Figure 1  
1000

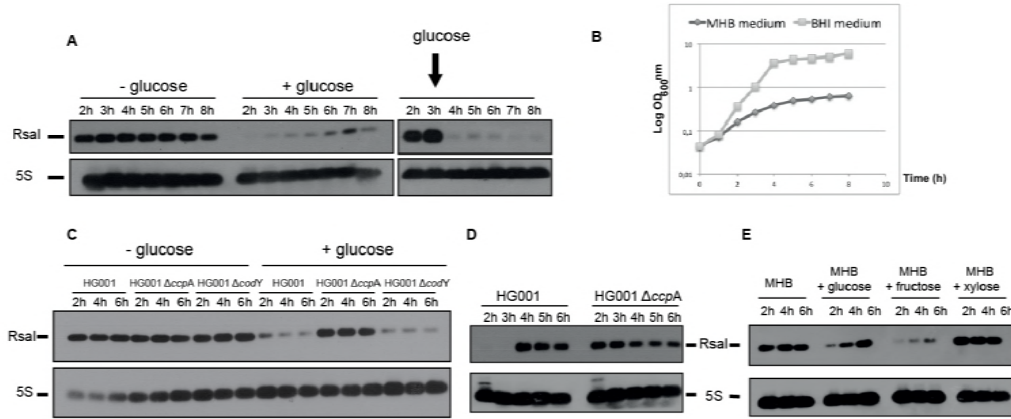

1001  
1002

1003 Figure 2  
1004

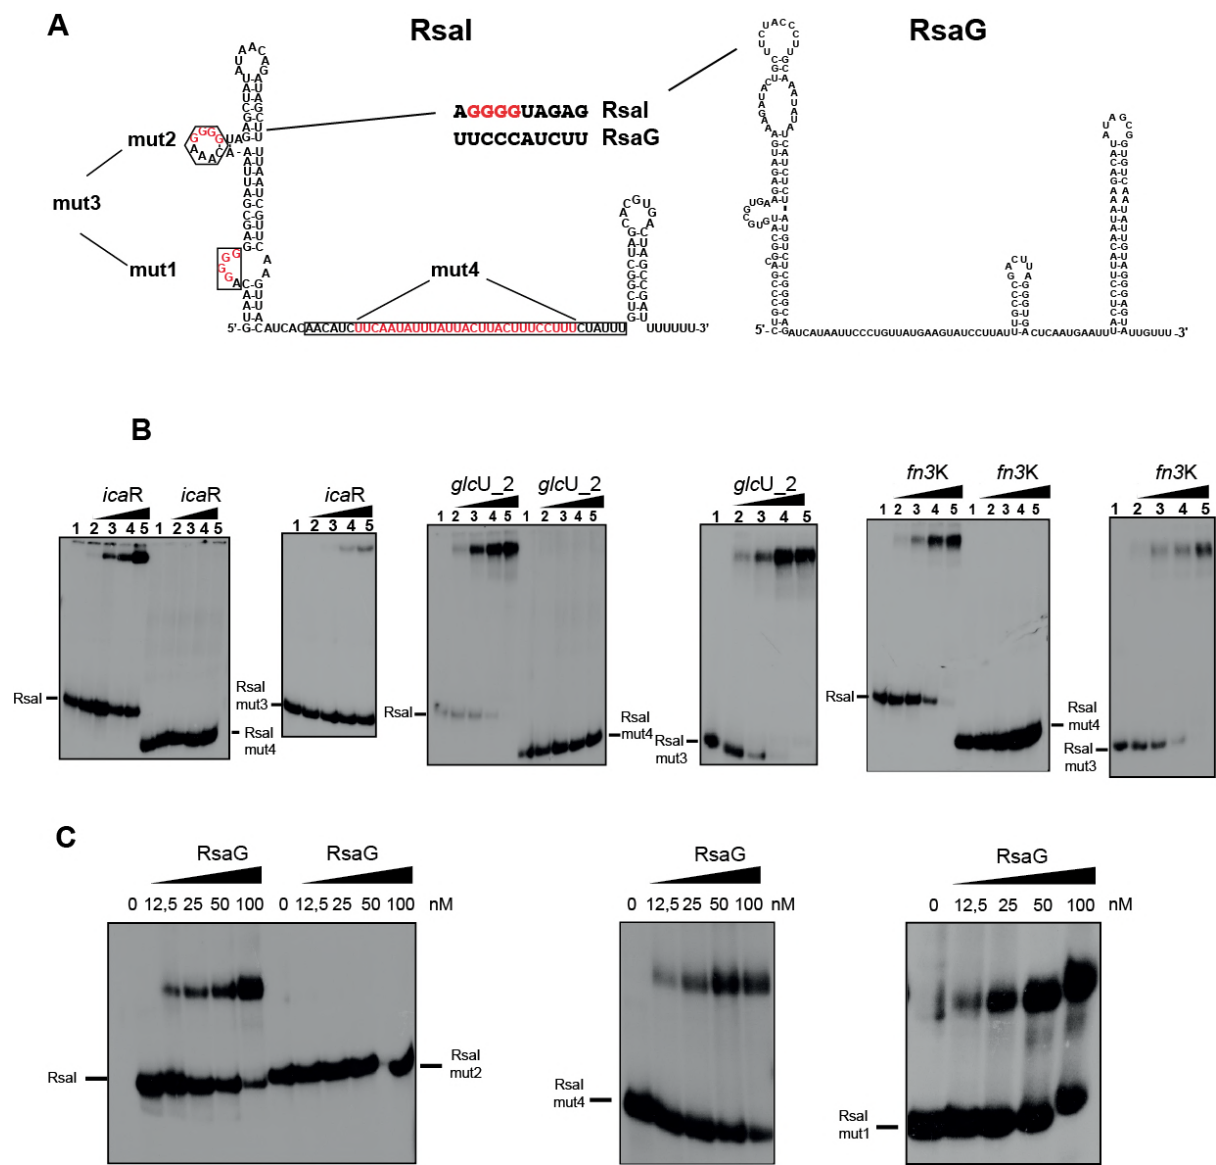

1005  
1006



1007 Figure 3  
1008

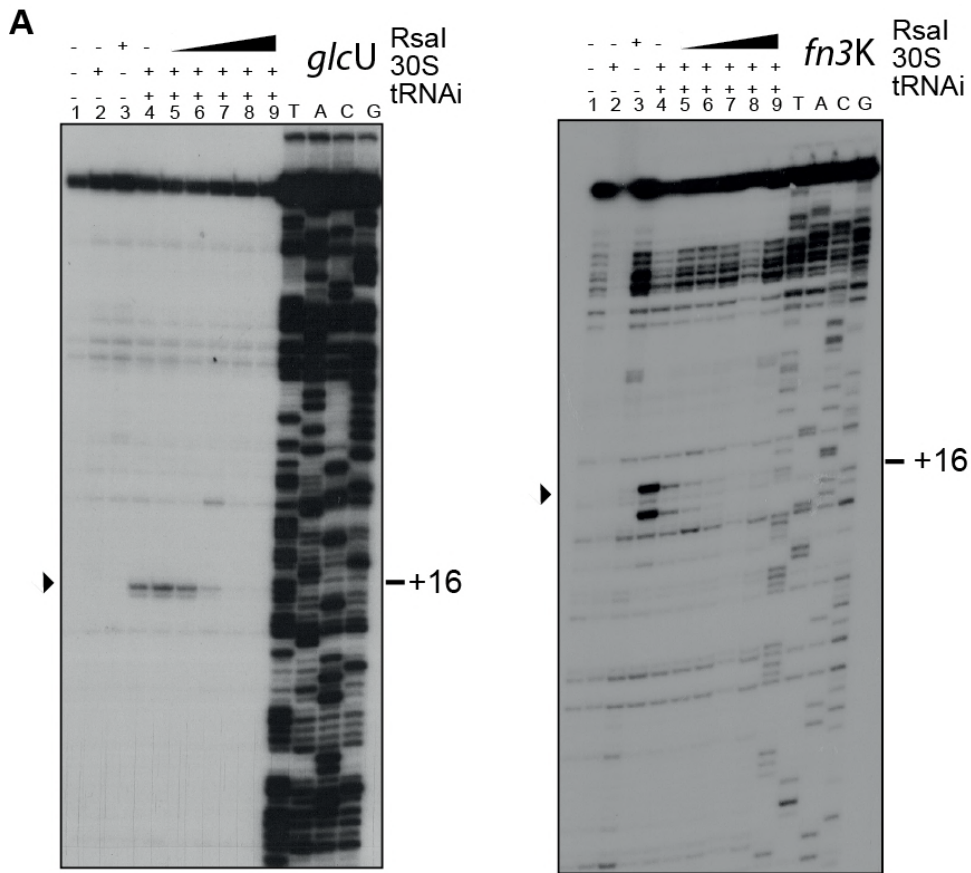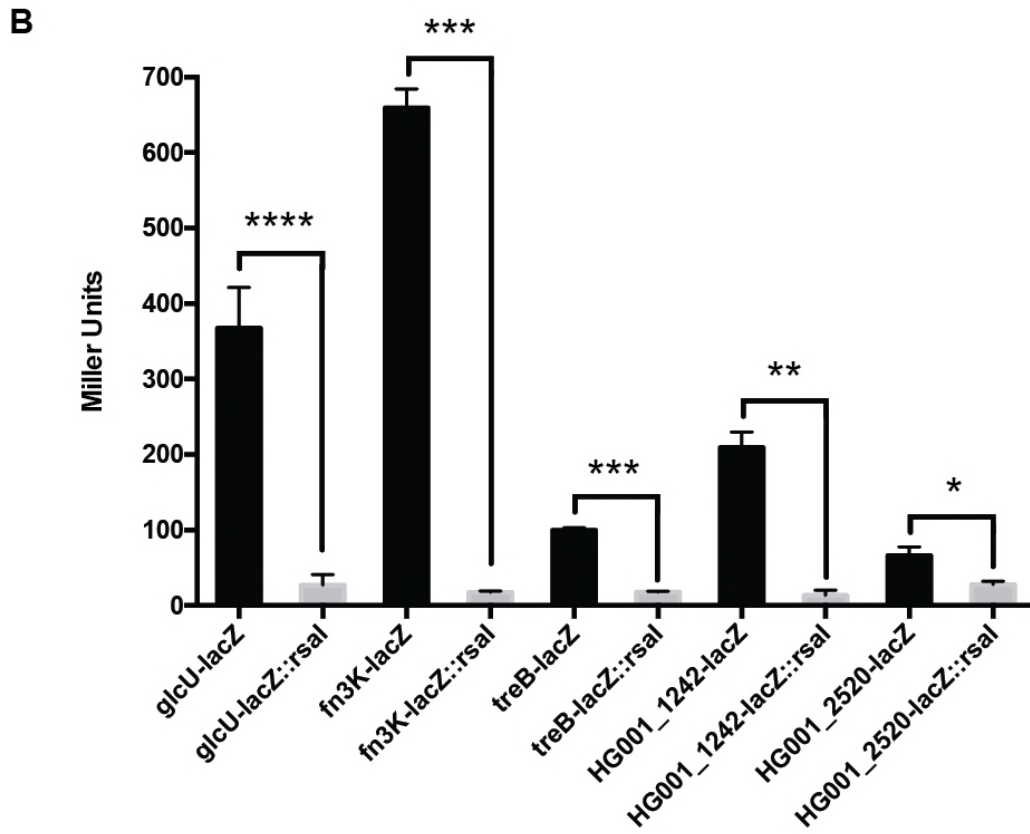

1009

1010 Figure 4  
 1011  
 1012

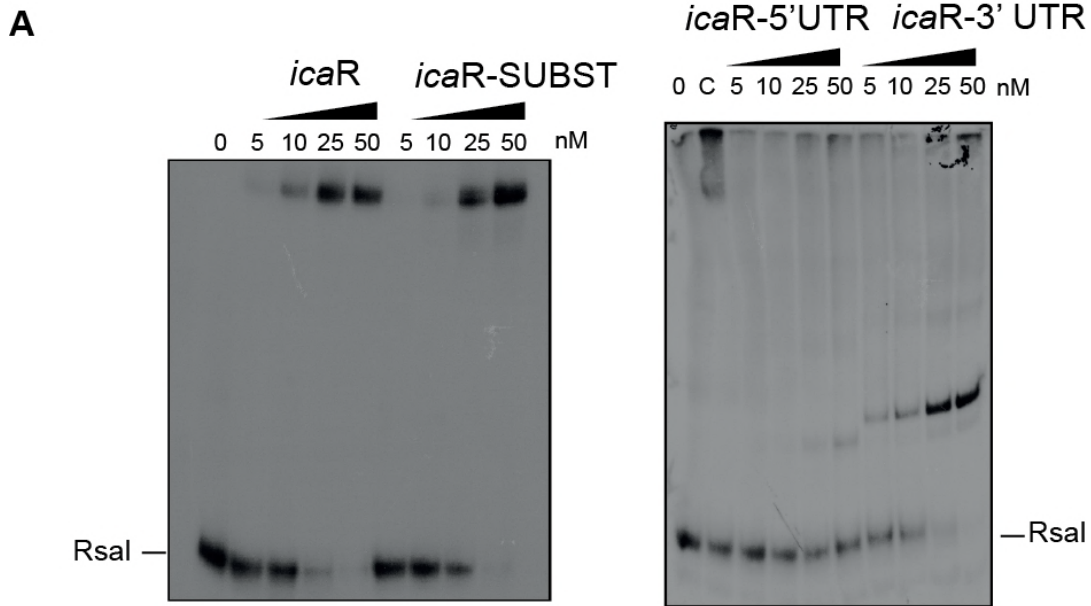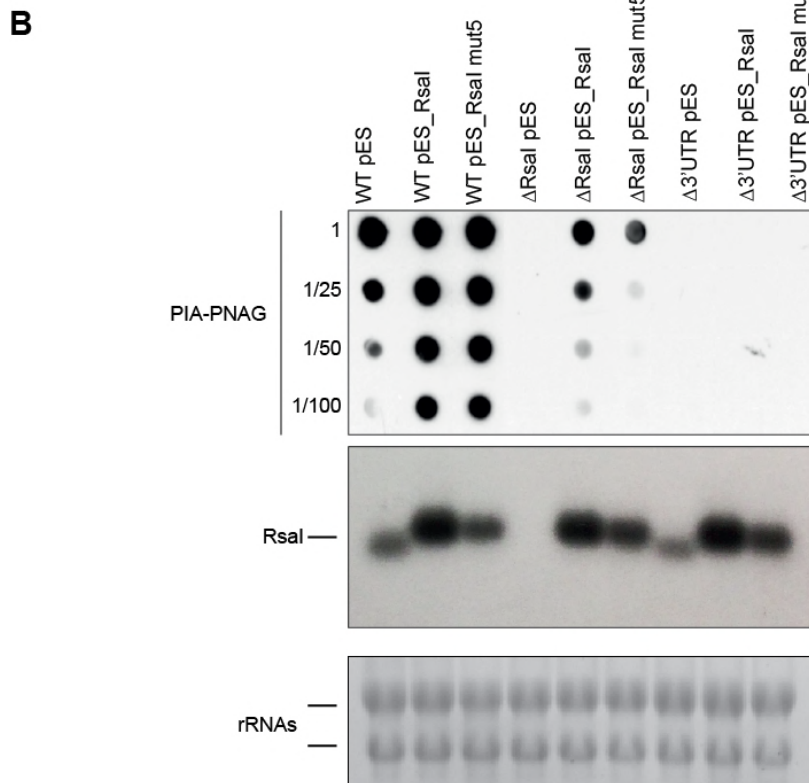

1013

1014 Figure 5

**A**

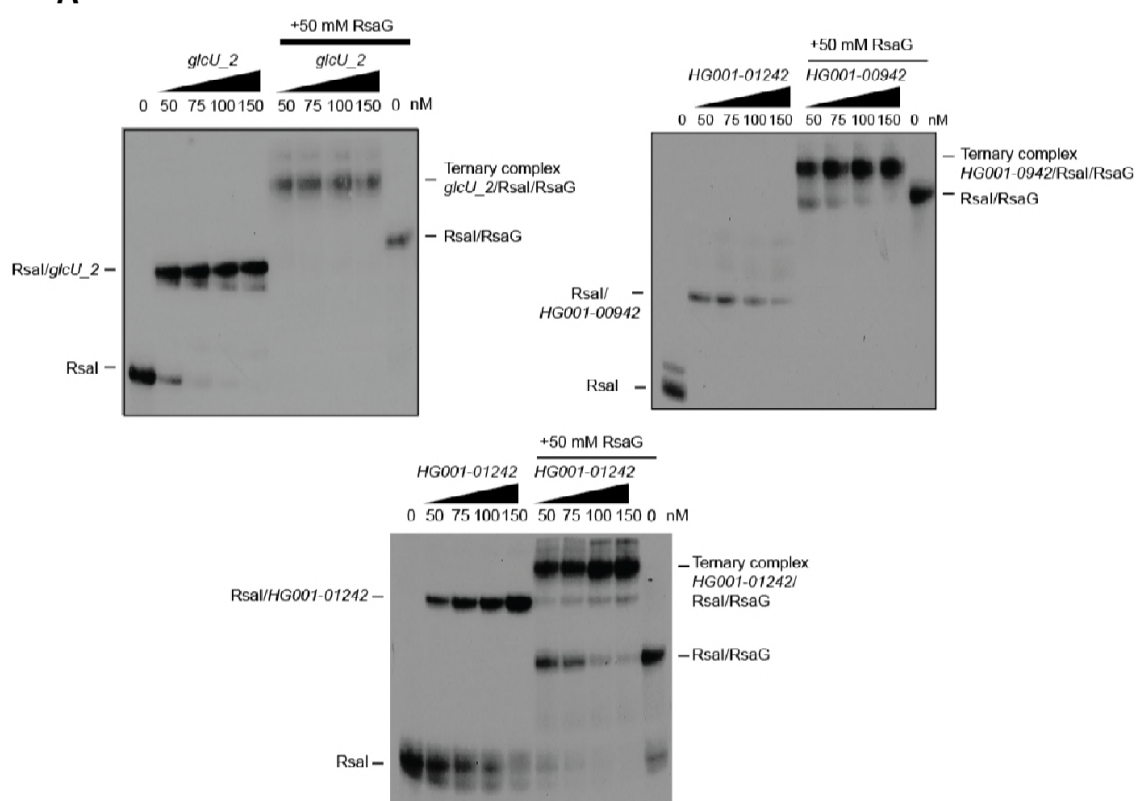

**B**

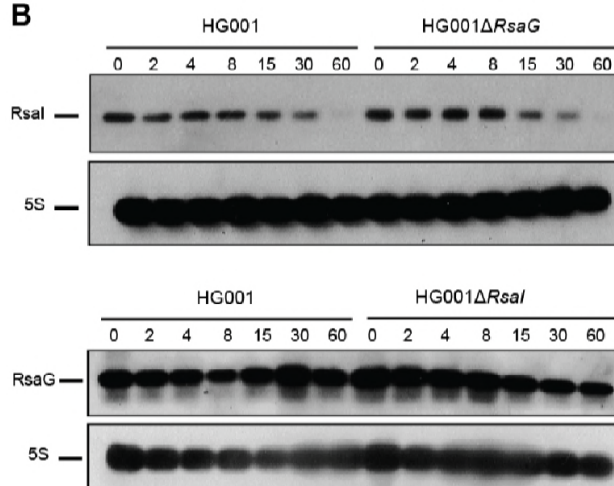

1015  
1016

1017 Figure 6  
1018

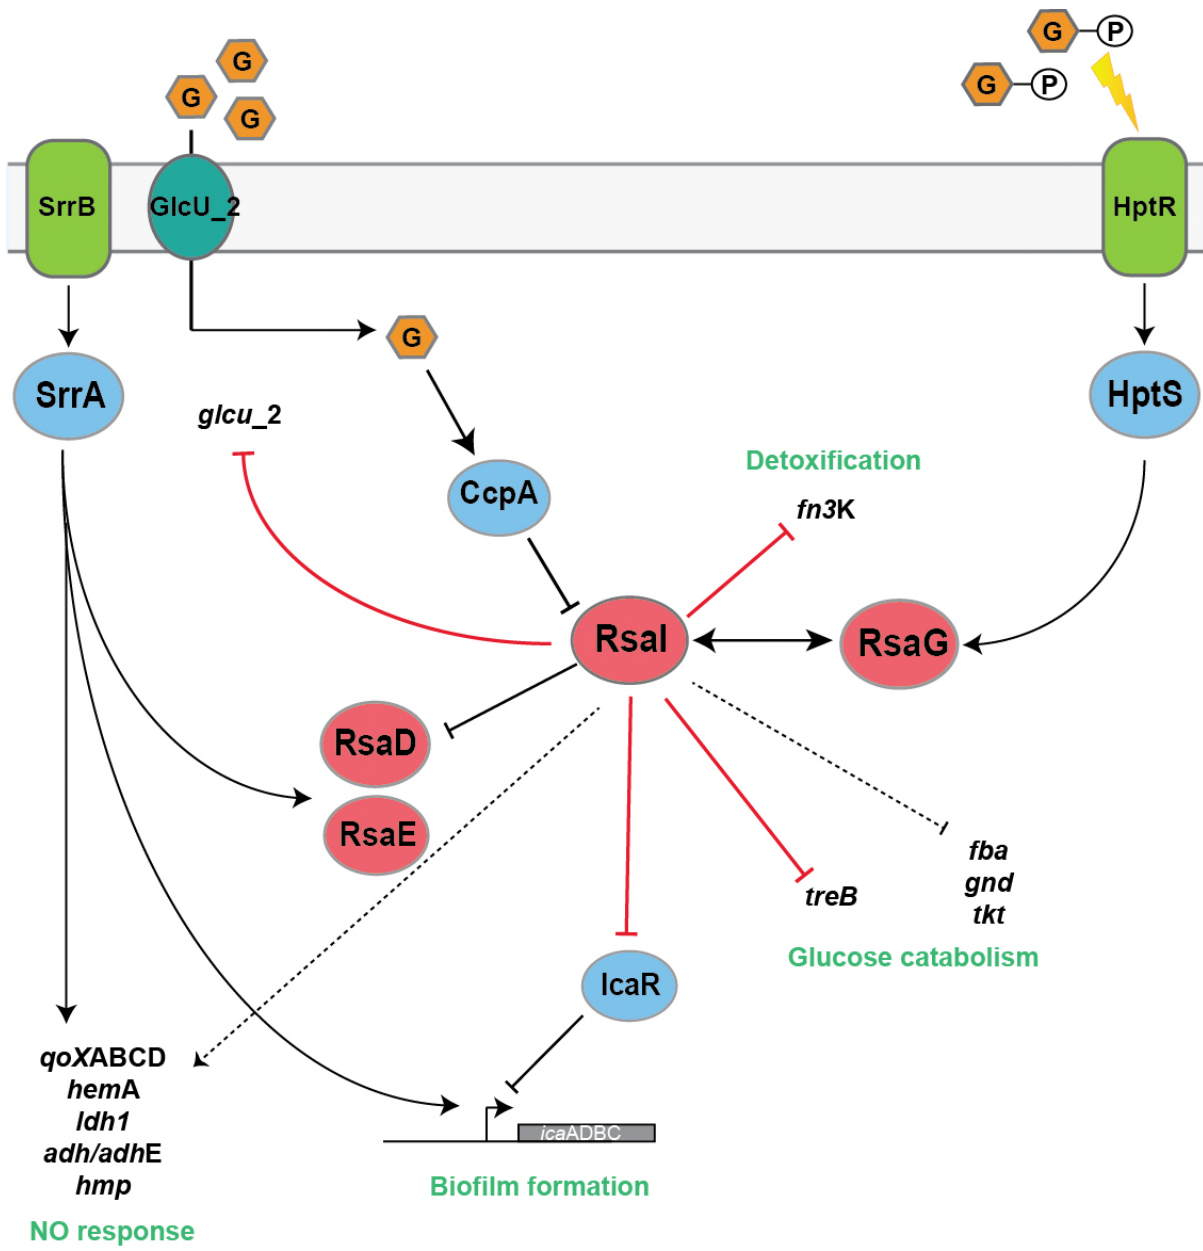

1019 NO response
